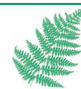

# Growing coffee: *Psilanthus* (Rubiaceae) subsumed on the basis of molecular and morphological data; implications for the size, morphology, distribution and evolutionary history of *Coffea*

AARON P. DAVIS<sup>FLS</sup><sup>1\*</sup>, JAMES TOSH<sup>2</sup>, NICOLAS RUCH<sup>1†</sup> and MICHAEL F. FAY<sup>FLS</sup><sup>1</sup>

<sup>1</sup>Royal Botanic Gardens, Kew, Richmond, Surrey TW9 3AB, UK

<sup>2</sup>National History Museum, Cromwell Road, London SW7 5BD, UK

Received 11 April 2011; revised 7 July 2011; accepted for publication 9 August 2011

Morphological and molecular phylogenetic studies show that there is a close relationship between *Coffea* and *Psilanthus*. In this study we reassess species relationships based on improved species sampling for *Psilanthus*, including *P. melanocarpus*, a species that shares morpho-taxonomic characters of both genera. Analyses are performed using parsimony and Bayesian inference, on sequence data from four plastid regions [*trnL-F* intron, *trnL-F* IGS, *rpl16* intron and *accD-psa1* intergenic spacer (IGS)] and the internal transcribed spacer (ITS) region of nuclear ribosomal DNA (ITS 1/5.8S/ITS 2). Several major lineages with geographical coherence, as identified in previous studies based on smaller and larger data sets, are supported. Our results also confirm previous studies showing that the level of sequence divergence between *Coffea* and *Psilanthus* species is negligible, particularly given the much longer branch lengths separating other genera of tribe Coffeaeae. There are strong indications that neither *Psilanthus* nor *Coffea* is monophyletic. *Psilanthus melanocarpus* is nested with the *Coffea-Psilanthus* clade, which means that there is only one critical difference between *Coffea* and *Psilanthus*; the former has a long-emergent style and the latter a short, included style. Based on these new data, in addition to other systematically informative evidence from a broad range of studies, and especially morphology, *Psilanthus* is subsumed into *Coffea*. This decision increases the number of species in *Coffea* from 104 to 124, extends the distribution to tropical Asia and Australasia and broadens the morphological characterization of the genus. The implications for understanding the evolutionary history of *Coffea* are discussed. A group of closely related species is informally named the ‘*Coffea liberica* alliance’. © 2011 The Linnean Society of London, *Botanical Journal of the Linnean Society*, 2011, 167, 357–377.

**ADDITIONAL KEYWORDS:** *accD-psa1* intergenic spacer (IGS) – Coffeaeae – crop wild relatives (CWR) – internal transcribed spacer (ITS) – Old World biogeography – molecular phylogenetics – morphology – *rpl16* intron – *trnL-F* intron – *trnL-F* IGS.

## INTRODUCTION

### TAXONOMIC BACKGROUND

*Psilanthus* Hook.f. is a genus of 20 species, occurring in the Old World Tropics from West Africa to northern Australia (Davis, 2003; Govaerts *et al.*, 2011). Since its inception (Hooker, 1873a, b), when it contained a

single species (*P. mannii* Hook.f.), *Psilanthus* has been closely associated with *Coffea* L. Hooker (1873a) stated that: ‘As a genus it is evidently clearly allied both in habit and characters to *Coffea*, differing in accrescent eglandular calyx, and in the structure of the fruit, which is crustaceous and 2-celled, not drupaceous with 2 pyrenes’. However, he went on to say: ‘I do not, however, place much dependence on this last point, for though fully formed, being seedless, the fruits of *Psilanthus* may be abnormally developed’ (Hooker, 1873a). In the *Flora of Tropical*

\*Corresponding author. E-mail: a.davis@kew.org

†Current address: Royal Botanic Garden Edinburgh, 20A Inverleith Row, Edinburgh EH3 5LR, UK.

Africa Hiern (1877) provided a description for *Psilanthus*, separating it from *Coffea* mainly on the basis of its included or partly included anthers (vs. anthers exerted or partly included in *Coffea*), included style (vs. shortly exerted), and fruit crowned by subfoliaceous, accrescent calyx lobes (vs. non-acrescent). Hiern (1877) added two more species of *Psilanthus*, *P. ebracteolatus* Hiern and *P. tetramerus* Hiern (= *P. mannii*) and, although he made no direct comparison with *Coffea*, he placed the two genera together in his numbering sequence. The placement of *P. ebracteolatus* was, however, not entirely consistent with his delimitation of *Psilanthus*: this species has a short, included style and included anthers but lacks the distinct large accrescent calyx lobes of *P. mannii*. De Wildeman (1910) added a third species, *P. sapinii* De Wild, a species closely related (Maurin *et al.*, 2007) and morphologically similar to *P. mannii*.

Chevalier (1942) enumerated five *Psilanthus* species: *P. mannii*, *P. ledermannii* A.Chev. ined. (= *P. mannii*), *P. minor* A.Chev. ined. (= *P. sapinii*), *P. ebracteolatus* and *P. jasminoides* Hutch. & Dalziel (= *Argocoffeopsis eketensis* (Wernham) Robbr.). This delimitation has been considered (Davis, Bridson & Rakotonasolo, 2005) illogical given the key characters used by Chevalier (1942) to separate *Psilanthus* and *Coffea*, which would exclude *P. ebracteolatus* and *P. jasminoides*: calyx limb surmounted by five accrescent lobes, which are filiform at first but rapidly become foliaceous (vs. calyx limb entire or slightly toothed in *Coffea*); fruit with five narrow wings, extending from the limb of the calyx to the base of fruit (vs. fruits without wings). In a later study, Chevalier (1947: 226) placed *P. ebracteolatus* in its own genus, *Cofeanthus* A.Chev. *Psilanthus jasminoides* was retained in *Psilanthus*, even although the name is based on the same type specimen as *Coffea jasminoides* Welw. ex Hiern, which he placed in *Coffea* section *Argocoffea* Pierre ex De Wild. (Chevalier, 1947: 131); both of these names have since been transferred to the genus *Argocoffeopsis* Lebrun and are synonyms of *A. eketensis* (Wernham) Robbr. (Robbrecht, 1986: 158).

The first person to contest the delimitation of *Psilanthus* spp. was Brenan (1953: 115–116). Upon examination of fully mature fruits of *P. ebracteolatus*, Brenan was in little doubt as to the affinities of this species. He observed, correctly, that the fruits of *P. ebracteolatus* are ‘quite smooth outside, and the calyx is scarcely visible at all’ (Brenan, 1953: 116), in other words, markedly different from those of *P. mannii*, fruits of which have five narrow longitudinal wings on the outside and are crowned by five large, accrescent foliaceous calyx lobes. Brenan (1953: 116) stated that: ‘I am unable to see any reason against *P. ebracteolatus* being a *Coffea*, the fruits and

seeds in particular showing very good agreement. The seeds of *P. ebracteolatus* when roasted smell distinctly of coffee’. In conclusion, Brenan formally placed *P. ebracteolatus* in *Coffea* (*C. ebracteolatus* (Hiern) Brenan).

Upon detailed study of African and Asian *Coffea*, Leroy (1962a, b, 1967a, b, c, 1968b) transferred nine species of *Coffea* section *Paracoffea* Miq. to the genus *Paracoffea* J.-F.Leroy (Davis, 2003), his circumscription of this genus being largely based on the works of Chevalier (1929, 1938, 1942, 1947). After further consideration of African and Madagascan *Coffea* relatives, Leroy (1980a) decided to make *Paracoffea* a subgenus of *Psilanthus*, and proposed two subgenera: subgenus *Psilanthus* for species from Africa (*P. mannii* and *P. sapinii*, i.e. those species with the distinctive accrescent calyx lobes and winged fruit) and subgenus *Paracoffea* (Miq.) J.-F.Leroy for all other species, from Africa, Asia and New Guinea, but excluding any Madagascan species (Leroy, 1980b). Following his reorganization of *Psilanthus*, Leroy (1981) placed several species of *Coffea* (*C. benghalensis* B.Heyne ex Schult., *C. cochinchinensis* Pierre ex Pit., *C. floresiana* Boerl., *C. fragrans* Wall. ex Hook.f., *C. mabesae* (Elmer) J.-F. Leroy, *C. madurensis* Teijsm. & Binn. ex Koord., *C. melanocarpa* Welw. ex Hiern, *C. wightiana* Wall. ex Wight & Arn.) in *Psilanthus*, presumably as representatives of *Psilanthus* subgenus *Paracoffea*. However, Leroy overlooked *Coffea* subgenus *Afrocoffea* Moens (Moens, 1962), which predates and competes with the use of *Paracoffea* at subgeneric rank (Bridson, 1987; Davis, 2003). The placement of *Paracoffea* spp. in *Psilanthus* subgenus *Afrocoffea* has since been upheld (e.g. Bridson, 1987, 1988a, b; Sivarajan, Biju & Mathew, 1992; Stoffelen, 1998; Davis, 2003). *Paracoffea brassii* J.-F.Leroy (Leroy, 1968a) was added to *Psilanthus* (subgenus *Afrocoffea*) by Davis (2003).

The morphological description of *Paracoffea*, and hence *Psilanthus* subgenus *Paracoffea*, as given Leroy (1967b: 1044) is as follows, with characters for *Coffea* in parentheses, redundant or identical characters removed and exceptions in square brackets: bushy shrubs (vs. shrubs, well-branched shrubs, trees); growth habit mixed, monopodial and sympodial, rarely monopodial [only *Paracoffea melanocarpa*] (vs. exclusively monopodial); generally deciduous but in Africa sometimes semi-persistent or persistent (vs. leaves generally persistent); leaves thin (vs. leaves thick), often with hairs well developed, sometimes glabrous (vs. glabrous); inflorescences generally terminal, or terminal and axillary, or axillary [only *P. melanocarpa*] (vs. inflorescences exclusively axillary, sometimes subterminal); lacking calyculi [except *P. melanocarpa*] (vs. one or many calyculi); corolla tube long (vs. corolla tube relatively short); anthers

included and sessile [except Madagascan species], generally supramedifixed or medifixed (vs. exerted, submedifixed); style included [except Madagascan species] (vs. style exerted); fruits didymous sometimes winged (vs. not or slightly didymous, not winged); tegument of seed with dorsal vascularization (vs. with or without dorsal vascularization); pollen tri- or tetraporate or tetraporate (vs. generally tricolporate), sexine clavulate or clavulate-reticulate, sometimes very thick (vs. sexine baculate). Leroy (1967a, c) used the term 'epicalice', epicalyx in English, and Chevalier (1942) used (connate) bracteoles, but the term now employed is calyculus (singular)/calyculi (plural) (Davis *et al.*, 2005). A calyculus is a tubular or cup-like structure subtending the flowers and resembling a calyx. It is formed from reduced stipules and leaves (Davis *et al.*, 2005).

Based on all the characters given by Leroy (1967a, b, c, 1980a, b, 1981), Bridson (1988b) summarized the key differences between *Psilanthus* and *Coffea* as: anthers included, filaments absent or very short (vs. exerted, filaments long); style short, included (vs. long, exerted); corolla tube always longer than lobes (vs. corolla tube usually about the same length as the lobes); inflorescences (and flowers) terminal on reduced shoots or some species both terminal and axillary [vs. inflorescences (flowers) axillary or less often terminal on reduced shoots]. According to Bridson (1987, 1988a), the differences between subgenus *Psilanthus* (*P. mannii* and *P. sapinii*) and subgenus *Afrocoffea* (all other *Psilanthus* spp.) were: evergreen habit, with a sympodial growth pattern (vs. mostly deciduous, mostly with a monopodial growth pattern), and large, accrescent calyx lobes (vs. small, non-acrescent calyx lobes). Bridson (1982) added two new African species of *Psilanthus*, *P. leroyi* Bridson and *P. semsei* Bridson, and made one new combination for an African *Coffea* species: *P. lebrunianus* (Germ. & Kesler) J.-F.Leroy ex Bridson (Bridson, 1987). The most recent *Psilanthus* spp. were Indian taxa described by Sivarajan *et al.* (1992), *P. babudanii* Sivar., Biju & P.Mathew, *P. bridsoniae* Sivar., Biju & P.Mathew and *P. malabaricus* Sivar., Biju & P.Mathew, although these species were later placed into the synonymy of *P. benghalensis* (B.Heyne ex Schult.) J.-F.Leroy, *P. wightianus* (Wall. ex Wight & Arn.) J.-F.Leroy and *P. fragrans* (Wall. ex Hook.f.) J.-F.Leroy, respectively, by Deb (2002).

#### MORPHOLOGICAL ASSESSMENTS

A morphological reassessment of *Coffea* and *Psilanthus* by Davis *et al.* (2005) largely supported the findings of Bridson (1988a, b), in that *Psilanthus* can be separated from *Coffea* on the basis of five morphological characters (see above for characters in *Coffea*): (1)

absent or very short (< 0.5 mm long) filaments [except *P. melanocarpus*; anthers 0.5–1.0 mm long]; (2) supramedifixed anthers [except *P. melanocarpus*; submedifixed]; (3) included or just emergent anthers; (4) short styles; (5) and mean number of pollen apertures (after Stoffelen, Robbrecht & Smets, 1997). Davis *et al.* (2005) argued that all *Psilanthus* and *Coffea* spp. possess calyculi, one of the key characters used in the characterization of *Psilanthus* by Leroy (1967b, 1972a, b). Davis *et al.* (2005) made the observation that, although calyculi can be highly modified, especially in *Coffea* subgenus *Baracoffea* (J.-F.Leroy) J.-F.Leroy (currently known as the 'Baracoffea alliance'; Davis & Rakotonasolo, 2008), the basic structure is remarkably consistent across the two genera. In particular, the foliar leaves subtending the flowers in the *Baracoffea* alliance and in many *Psilanthus* are in fact modified (enlarged) foliar lobes of the calyculus. Davis *et al.* (2007) went even further, proposing that calyculi are present in all 11 genera of Coffeae DC., and that the presence of these structures is one of the key characters of the tribe. Davis *et al.* (2005) also showed that two other key characters used for the characterization of *Psilanthus* by Leroy (1967b, 1972a, b) were also found in *Coffea*. Firstly, the sympodial growth pattern and terminal inflorescence position (the latter influences the former) of *Psilanthus* is also found in the *Baracoffea* alliance and *C. rhamnifolia* (Chiov.) Bridson. Secondly, although the corolla tube of *Psilanthus* is usually distinctly long-tubular (always much longer than the corolla lobes), and in most *Coffea* it is short-tubular (shorter to slightly longer than the corolla lobes), in the *Baracoffea* alliance the corolla tubes are of a similar length to those in *Psilanthus*. Davis *et al.* (2005) discussed the possibility that anther appendages could represent a morphological difference between *Coffea* and *Psilanthus*, as some *Psilanthus* spp. possess sterile appendages at the apex of the filaments (Bridson, 1982: fig. 13e) and this character is lacking in *Coffea*. These appendages are usually quite short (e.g. c. 1 mm long or less), and either pointed or obtuse at the apex. However, Davis *et al.* (2005) found that sterile anther appendages were absent in at least three *Psilanthus* spp.: *P. leroyi*, *P. melanocarpus* and *P. travancorensis* (Wight & Arn.) J.-F.Leroy.

Davis *et al.* (2005) reiterated the anomalous position of *P. melanocarpus* within *Psilanthus*: it has submedifixed anthers (like *Coffea*) and anther filaments 0.5–1.0 mm long (vs. 0.5 mm in *Psilanthus*; 2 mm or longer in *Coffea*). Furthermore, the evergreen habit and axillary inflorescences of *P. melanocarpus* resemble *Psilanthus* subgenus *Psilanthus* (i.e. *P. mannii* and *P. sapinii*), even though it clearly lacks the accrescent calyx lobes and ribbed fruits of this subgenus. Davis *et al.* (2005) concluded that: 'Our

data infer that *P. melanocarpus* should be removed from *Psilanthus* subgenus *Afrocoffea*, but we cannot say where this taxon should be placed within the “core Coffeae”. Earlier, Andreasen & Bremer (1996) stated that: ‘*P. melanocarpus* should be placed either in a genus of its own or in *Coffea*, rather than be included in *Psilanthus*. Our morphological data, however, do not support the placement of *P. melanocarpus* within *Coffea*’.

Maurin *et al.* (2007) elaborated on the morphological discussion of Davis *et al.* (2005), and in particular with reference to their molecular analysis, which showed that *Coffea* subgenus *Baracoffea* (i.e. the *Baracoffea* alliance; Davis & Rakotonasolo, 2008) and *C. rhamnifolia* are nested within *Coffea* subgenus *Coffea*. The *Baracoffea* alliance is a group of nine species from the western, seasonally dry forests of Madagascar, and *C. rhamnifolia* is from the dry shrublands of north-east Kenya and south-east Somalia (Davis *et al.*, 2006; Davis & Rakotonasolo, 2008). These taxa share many of the characters of *Psilanthus* subgenus *Afrocoffea* (Leroy, 1961; Davis *et al.*, 2005), particularly deciduousness, axillary and terminal inflorescences, the presence of an indumentum (leaves and corolla) and long corolla tubes (only the *Baracoffea* alliance). These results effectively reduced the morphological differences between *Coffea* and *Psilanthus*. Maurin *et al.* (2007) did not sample *P. melanocarpus* but argued that if it were placed with either *Coffea* or *Psilanthus*, the differences between the genera would be minimal. As a species of *Psilanthus*, only two characters would separate *Psilanthus* and *Coffea*: (1) short (fully within corolla tube) vs. long (emergent) style; (2) mostly or fully included anthers vs. partially emergent or fully emergent anthers. If *P. melanocarpus* were nested within *Coffea*, then only one character would separate *Psilanthus* and *Coffea*: absent or very short (0.5 mm long) filaments vs. longer (0.5–2.0 mm, or longer) filaments. Clearly, these differences are not substantial.

The number of pollen apertures (Leroy, 1967b; Lobreau-Callen & Leroy, 1980; Chinnappa & Warner, 1981; Stoffelen *et al.*, 1997) has been used as additional evidence to separate *Coffea* and *Psilanthus*. However, considerable polymorphism is evident and there is overlap in the number of apertures and sexine ornamentation between the two genera and between their subgenera (Stoffelen *et al.*, 1997; Davis *et al.*, 2005).

#### MOLECULAR PHYLOGENETIC DATA

Lashermes *et al.* (1997) used the internal transcribed spacer (ITS) region (ITS2) to examine relationships between 37 accessions of *Coffea* and three accessions of *Psilanthus*. Their study indicated limited sequence

variation between the two genera. In some of their analyses, *P. mannii* and *P. ebracteolatus* were placed sister to a clade of east African *Coffea* spp.; the Indian species, *P. travancorensis*, was nested within a clade of Madagascan species. Cros *et al.* (1998) examined 23 *Coffea* taxa and two *Psilanthus* spp. in their study, using plastid sequences from the *trnL-trnF* intergenic spacer (IGS). They also detected low levels of sequence variation between *Coffea* and *Psilanthus* and stated that *P. mannii* and *P. ebracteolatus* do not appear to be closely related. Lashermes *et al.* (1997) and Cros *et al.* (1998) concluded that the division of *Coffea* and *Psilanthus* into two genera was unsupported. Maurin *et al.* (2007) sampled 84 species (86 accessions) of *Coffea* and seven species of *Psilanthus* (82% and 35% of the total species diversity, respectively) using sequence data from four plastid regions (*trnL-F* intron, *trnL-F* IGS, *rpl16* intron and *accD-psa1* IGS) and the ITS region (ITS1/5.8S/ITS2). Their combined plastid analysis shows that African *Psilanthus* (*P. ebracteolatus*, *P. mannii*, *P. sapinii*, *P. semsei*, *P. sp. A*) are sister to *Coffea* spp. from the Lower Guinea/Congolian region [BP (bootstrap percentage value; Felsenstein, 1985) 53; *b* (Bremer support value/decay value; Bremer, 1988, 1994; Källersjö *et al.*, 1992) = 1]; African *Psilanthus* (BP 85; *b* = 2) and Indian *Psilanthus* (*P. bridsoniae*, *P. travancorensis*) (BP 100; *b* = 7) are both well supported, although the latter was unresolved at the base of the tree. The ITS analyses provides less information on relationships for *Psilanthus* spp.: the two species of Indian *Psilanthus* are well supported as a clade (BP 93; *b* = 4), but the relationships for the other species are unresolved. Their combined plastid–ITS analysis shows that Indian *Psilanthus* (BP 100; *b* = 12) and African *Psilanthus* (BP 96; *b* = 5) form well-supported clades. *Psilanthus* subgenus *Psilanthus* (*P. mannii*, *P. sapinii*) was well supported (BP 99; *b* = 5), but the monophyly of *Psilanthus* subgenus *Afrocoffea* was not substantiated. *Coffea rhamnifolia* was placed with the two species of Indian *Psilanthus*, but this relationship was weakly supported (BP 57; *b* = 1). As in the combined plastid analysis and ITS analysis, the relationship between *Coffea* and *Psilanthus* was largely unresolved because of low levels of sequence divergence. Maurin *et al.* (2007) concluded that: ‘The robust morphological (Robbrecht & Puff, 1986; Davis *et al.*, 2005) and molecular support for *Coffea* plus *Psilanthus* (Davis *et al.*, 2007), low sequence diversity between these genera (Davis *et al.*, 2007, fig. 4) and indications of parphyly (Davis *et al.*, 2007, figs 2 and 4), may be taken as evidence for accepting *Coffea* and *Psilanthus* as a single genus (Lashermes *et al.*, 1997; Cros *et al.*, 1998). However, it is believed that further molecular data are needed to resolve fully the relationship between *Coffea* and *Psilanthus*,

and in particular sequence data are required for *P. melanocarpus* and other species of *Psilanthus*'.

In an appraisal of tribe Coffeae, Davis *et al.* (2007) concluded that *Coffea* and *Psilanthus* formed a well-supported clade, based on combined molecular data (BP 100,  $b = 9$ ) and combined molecular-morphological data (BP 100,  $b = 13$ ), which was positioned in a sister relationship relative to the rest of the tribe. Morphologically, the *Coffea* and *Psilanthus* clade was supported by the apparent loss of secondary pollen presentation and the presence of a hard (horny/crustaceous) endocarp, seeds with a deep ventral groove and a seed coat consisting of crushed endostestal cells and more or less isolated fibres ('coffee bean' morphology).

The study of the genera of Coffeae by Tosh *et al.* (2009) supported many of the findings of Davis *et al.* (2007), but provided a much clearer indication of intergeneric sequence divergence within the tribe. Tosh *et al.* (2009) showed that well-established, easily circumscribed genera of Coffeae have substantially longer branch lengths supporting the genera relative to the branch lengths within these genera. The only obvious exceptions are the clades *Argocoffeopsis* Lebrun + *Calycosiphonia* Pierre ex Robbr. (BP 99, branch length ( $bl$ ) = 15) and *Coffea* + *Psilanthus* (BP 100,  $bl = 17$ ). Like *Coffea* and *Psilanthus*, the generic delimitation of *Argocoffeopsis* and *Calycosiphonia* is problematic and it is likely that these genera need to be combined as a single entity (Davis & Sonké, 2008).

Recently, Anthony *et al.* (2010) used plastid sequences from *trnL-F*, *trnT-L* and *atpB-rbcL* IGS from 24 *Coffea* taxa and two *Psilanthus* spp. (*P. mannii* and *P. ebracteolatus*), but were unable to offer any new insights because of low levels of sequence variation.

#### HYBRIDIZATION AND CYTOGENETIC STUDIES

Couturon, Lashermes & Charrier (1998) produced intergeneric hybrids between *C. arabica* L. ( $2n = 44$ ) and tetraploid genotypes of *P. ebracteolatus* ( $2n = 22$ ). Forty-one plants were obtained, with nine plants surviving after 5 months in a nursery. Hybrid status was confirmed by means of cytological, molecular and morphological analysis. Couturon *et al.* (1998) posited that the mean production of two surviving hybrids per 100 pollinated flowers, and their fertility, were comparable with those reported for intragenetic crosses between *Coffea* spp. Both the capacity of *C. arabica* to hybridize with *P. ebracteolatus* and the fertility of the resultant hybrids appear high enough to envisage intergeneric gene transfer from *P. ebracteolatus* into *C. arabica*. Even though the *P. ebracteolatus*-*C. arabica* hybrid was made under laboratory condi-

tions, with isolating barriers overcome by chemical and physical manipulation, Couturon *et al.* (1998) argued that the successful production of the hybrids demonstrates that intergeneric hybridization is not strongly affected by genome incompatibility and that their results did not support the separation of *Coffea* and *Psilanthus* at the generic level.

Cytogenetic studies of *Coffea* (*C. brevipes* Hiern, *C. racemosa* Lour.) and *Psilanthus* [*P. ebracteolatus*, *P. benghalensis* and *P. travancorensis*] were undertaken by Lombello & Pinto-Maglio (2003, 2004), using chromomycin A3/4',6-diamidino-2-phenylindole (CMA/DAPI) and fluorescence *in situ* hybridization (FISH) cytogenetic markers. Their analysis enabled karyological characterization of these species, but their main finding was the remarkable cytological similarity between the species and the two genera.

#### THE PRESENT STUDY

In this contribution we use the molecular markers *trnL-F* intron, *trnL-F* intergenic spacer (IGS), *rpl16* intron and *accD-psa1* IGS) and the ITS region (ITS1/5.8S/ITS2), as used by Maurin *et al.* (2007), to further elucidate the relationships between *Coffea* and *Psilanthus*. We examine ten species of *Psilanthus* (16 samples; 50% of the total species diversity) from across its natural range. This represents respectable taxonomic and geographical coverage for *Psilanthus*, considering that the Asian and Australasian species (13 species in total; four sampled here) are likely to be monophyletic, given their close morphological similarity (Davis *et al.*, 2005; Davis, 2010). An assumption of monophyly is supported by a molecular [random amplification of polymorphic DNA (RAPD) and inter-simple sequence repeat (ISSR) markers] study of four *Psilanthus* spp. from peninsula India, which showed statistically high values of genetic similarity (Kumar, Sudisha & Sreenath, 2008). Our study includes the morphologically incongruent *P. melanocarpus*, a species identified as critical for resolving the issue of delimitation and systematic placement of *Psilanthus* (Andreasen & Bremer, 1996, 2000; Davis *et al.*, 2005; Maurin *et al.*, 2007).

#### MATERIAL AND METHODS

##### TAXON SAMPLING AND PLANT MATERIAL

We used a broad sampling of 45 *Coffea* spp., based on the study of Maurin *et al.* (2007), with all major lineages included. Notably, Madagascan species were reduced to nine species, as taxa from this island are largely unresolved (Maurin *et al.*, 2007) based on the markers used. A further sample of *C. rhamnifolia* is included and we add *C. charrieriana* Stoff. & F. Anthony (Stoffelen *et al.*, 2008), which was sampled

by Anthony *et al.* (2010) but not by Maurin *et al.* (2007). For *Psilanthus*, we examine ten species (16 samples; 50% of the total species diversity). This sample includes a good representation of both subgenera: *Psilanthus* subgenus *Psilanthus* (all species) and *Psilanthus* subgenus *Afrocoffea* (eight species); and species from across the geographical range of the genus (Africa, India, Thailand and Australia). Four species not previously sampled in other molecular analyses are included here: *P. lebrunianus* (two samples), *P. brassii* (J.-F.Leroy) A.P.Davis (two samples), *P. merguensis* (Ridl.) J.-F.Leroy (one sample) and, crucially (see Introduction), *P. melanocarpus* (one sample). Further samples of *P. mannii* (two samples), and *P. ebracteolatus* (one sample) were newly sequenced. Three species of *Tricalysia* A.Rich. ex DC., a genus belonging to Coffeae (Davis *et al.*, 2007; Tosh *et al.*, 2009), were used as the outgroup. Adding further members of Coffeae and other Rubiaceae does not influence the ingroup topology, so further outgroups were not required; the systematic limits of Coffeae are well established (Davis *et al.*, 2007; Tosh *et al.*, 2009). Accession details and GenBank accession numbers for all samples are given in Table 1.

Taxonomic details and geographical range for all taxa (below generic rank) used or mentioned in this study follow the *World Rubiaceae Checklist* (Govaerts *et al.*, 2011; <http://www.kew.org/wcsp/rubiaceae>); more specific information for *Coffea* is given in Davis *et al.* (2006). Details of the subgeneric classification of *Coffea* and *Psilanthus*, including synonymy, is given in Davis (2003) and Davis *et al.* (2005).

#### MAP CONSTRUCTION AND USE OF PHYTOGEOGRAPHICAL AREAS

Figure 4 is based on the distribution of individual specimens for each species, as recorded in a *Coffea* specimen database (approximately 4100 records; A. Davis, S. Dawson and P. Stoffelen, unpubl. data) and Madagascan/Mascarene *Coffea* specimen database (approximately 1100 records; A. Davis and S. Dawson, unpubl. data). A species distribution map was plotted and then a generalized map was drawn by hand.

The terminology for area-based clades follows Maurin *et al.* (2007): Upper Guinea (UG) clade, Lower Guinea/Congolian (LG/C) clade, East–Central Africa (EC–Afr) clade, East Africa (EA) clade and Mascarenes (MAS) clade (see Fig. 3). We adopt the following abbreviations for the African/Indian Ocean clade (A/IO), and Indian Ocean clade (IO). The humid West and Central African forests are contained within the Guineo-Congolian Regional Centre of Endemism (White, 1983). Within this major region there are three subcentres of endemism for humid forest species: (1)

Upper Guinea; (2) Lower Guinea; and (3) Congolian (White, 1979). For practical purposes, subcentres (2) and (3) are often put together as the Lower Guinean/Congolian region and this convention is followed here.

DNA EXTRACTION, AMPLIFICATION AND SEQUENCING  
DNA extraction and PCR amplification and sequencing protocols followed Maurin *et al.* (2007).

#### DATA MATRIX COMPOSITION AND PHYLOGENETIC ANALYSES

DNA sequence assembly followed the methods of Maurin *et al.* (2007). Newly generated sequences were added to the matrices of Maurin *et al.* (2007) and aligned using MUSCLE (Edgar, 2004), with subsequent manual editing performed in MacClade (Maddison & Maddison, 2002).

Maximum parsimony was implemented to analyse: (1) *trnL-F*; (2) *rpl16*; (3) *accD-psa1*; (4) combined plastid data; (5) ITS and (6) combined sequence data, using PAUP\*. In all analyses, gaps were treated as missing data and characters were equally weighted and unordered (Fitch, 1971). All data sets were analysed separately and examined by eye in order to identify topological conflict, i.e. moderate to strong support for placement of a taxon in different clades. Tree searches were conducted using 10 000 replicates of random taxon sequence addition, retaining ten trees at each step, with tree–bisection–reconnection (TBR) branch swapping, delayed transformation (DELTRAN) optimization, MulTrees in effect and saving a maximum of ten trees per replicate. Support for clades in all analyses was estimated using bootstrap analysis (Felsenstein, 1985), with 10 000 replicates of full heuristic search, simple sequence addition, TBR swapping, with MulTrees in effect and saving a maximum of ten trees per replicate. Bootstrap support values (BP) are described as well supported (85–100%), moderate (75–84%) or low/weak (50–74%).

Bayesian analyses were implemented in MrBayes 3.1 (Huelsenbeck & Ronquist, 2001), using the University of Oslo Biportal (<http://www.biportal.uio.no>). DNA substitution models for each data partition were determined using Modeltest ver. 3.06 (Posada & Crandall, 1998) under the Akaike information criterion (AIC). For each data set, two independent Bayesian analyses, each with four chains and starting from random trees, were run for 5 000 000 generations, sampling trees every 1000 generations. TRACER ver. 1.4 (Rambaut & Drummond, 2007) was used to check that each parameter had an effective sample size (ESS) > 100. The initial 1250 trees (25%) from each Bayesian run were dis-

**Table 1.** Taxon accession data. Herbarium abbreviations after Holmgren *et al.* (1990). Where several internal transcribed spacer (ITS) types were isolated these are listed below with multiple GenBank accession numbers

| Taxon                                                                    | Voucher (and duplicates)         | Source                   | <i>accd-psa1</i> | <i>rpl16</i> | <i>trnL-F</i> | ITS                            |
|--------------------------------------------------------------------------|----------------------------------|--------------------------|------------------|--------------|---------------|--------------------------------|
| <i>Coffea ambongensis</i> J.-F.Leroy ex A.P.Davis & Rakotonas.           | Davis 2509 (K)                   | Madagascar               | DQ153419         | DQ153668     | DQ153786      | DQ153539/DQ153540/<br>DQ153541 |
| <i>Coffea anthonyi</i> Stoff. & F. Anthony                               | IRD-Montpelier OE 53 (K)         | Congo-Brazzaville        | DQ153489         | DQ153738     | DQ153856      | DQ153620                       |
| <i>Coffea arabica</i> L.                                                 | Jaufeally-Fakim 29 (K)           | Mascarenes (introduced)  | DQ153478         | DQ153727     | DQ153845      | DQ153609                       |
| <i>Coffea bakossi</i> Cheek & Bridson                                    | Lane 361 (BR, K)                 | Cameroon                 | DQ153468         | DQ153717     | DQ153885      | DQ153599                       |
| <i>Coffea boinensis</i> A.P.Davis & Rakotonas.                           | Davis 2502 (K)                   | Madagascar               | DQ153408         | DQ153657     | DQ153775      | DQ153528                       |
| <i>Coffea brevipes</i> Heim                                              | Maurin 8 (K)                     | Cameroon                 | DQ153460         | DQ153709     | DQ153827      | DQ153591                       |
| <i>Coffea bridsoniae</i> A.P.Davis & Mvungi                              | Davis 2904 (BR, K)               | Tanzania                 | DQ153455         | DQ153704     | DQ153822      | DQ153584/DQ153585/<br>DQ153586 |
| <i>Coffea campaniensis</i> J.-F.Leroy*                                   | Leroy 55 (K)                     | Mascarenes (Mauritius)   | DQ153470         | DQ153719     | DQ153837      | DQ153601                       |
| <i>Coffea canephora</i> Pierre ex A.Froehner                             | Maurin 21 (BR, K)                | Cameroon (cultivated)    | DQ153462         | DQ153711     | DQ153829      | DQ153593                       |
| <i>Coffea charrieriana</i> Stoff. & F. Anthony                           | Anthony <i>s.n.</i> (BR)         | Cameroon                 | FR828682         | FR828690     | FR832857      | FR832869                       |
| <i>Coffea congensis</i> A.Froehner                                       | Harris & Fay 1507 (BR, K, MO)    | Cameroon                 | DQ153467         | DQ153716     | DQ153884      | DQ153598                       |
| <i>Coffea costatifructa</i> Bridson                                      | ORSTOM 08 117 (K)                | Tanzania                 | DQ153473         | DQ153722     | DQ153840      | DQ153604                       |
| <i>Coffea eugeniooides</i> S.Moore                                       | Harley 9332 (BR, K)              | Tanzania                 | DQ153457         | DQ153706     | DQ153824      | DQ153588                       |
| <i>Coffea fadenii</i> Bridson                                            | Mvungi 9 (DSM, K)                | Tanzania                 | DQ153446         | DQ153695     | DQ153813      | DQ153574                       |
| <i>Coffea grevei</i> Drake ex A.Chev.                                    | Davis 2566 (K)                   | Madagascar               | DQ153414         | DQ153663     | DQ153781      | DQ153534                       |
| <i>Coffea heterocalyx</i> Stoff.                                         | Maurin 23 (BR, K)                | Cameroon                 | DQ153463         | DQ153712     | DQ153830      | DQ153594                       |
| <i>Coffea humbertii</i> J.-F.Leroy                                       | Rakotonasolo 50 (BR, K,TAN)      | Madagascar               | DQ153437         | DQ153686     | DQ153804      | DQ153565                       |
| <i>Coffea humilis</i> A.Chev.                                            | Bamps 1967 (BR)                  | Ivory Coast              | DQ153480         | DQ153729     | DQ153847      | DQ153611                       |
| <i>Coffea kapakata</i> (A.Chev.) Bridson                                 | Hepper & Mailey 7723 (K)         | Angola                   | DQ153465         | DQ153714     | DQ153832      | DQ153596                       |
| <i>Coffea kianjavatensis</i> J.-F.Leroy                                  | Davis 2313 (K)                   | Madagascar               | DQ153482         | DQ153731     | DQ153849      | DQ153613                       |
| <i>Coffea kihansiensis</i> A.P.Davis & Mvungi                            | Mvungi 21 (DSM, K)               | Tanzania                 | DQ153454         | DQ153703     | DQ153821      | DQ153583                       |
| <i>Coffea kimboensis</i> Bridson                                         | Mvungi 6 (DSM, K)                | Tanzania                 | DQ153447         | DQ153696     | DQ153814      | DQ153575                       |
| <i>Coffea kivuensis</i> Lebrun                                           | Lebrun 5539 (BR)                 | DR Congo                 | DQ153481         | DQ153730     | DQ153848      | DQ153612                       |
| <i>Coffea pterocarpa</i> A.P.Davis & Rakotonas.                          | Davis 2519 (K)                   | Madagascar               | DQ153425         | DQ153674     | DQ153792      | DQ153550                       |
| <i>Coffea labatii</i> A.P.Davis & Rakotonas.                             | Davis 3069 (K)                   | Madagascar               | DQ153499         | DQ153748     | DQ153866      | DQ153630                       |
| <i>Coffea liberica</i> var. <i>liberica</i> Bull. ex Hiern               | Van Caekenbergh 442 (BR)         | DR Congo                 | DQ153479         | DQ153728     | DQ153846      | DQ153610                       |
| <i>Coffea liberica</i> var. <i>dewereii</i> (De Wild. & T.Durand) Lebrun | Hepper & Mailey 7729 (BR, K, MO) | Central African Republic | DQ153472         | DQ153721     | DQ153839      | DQ153603                       |
| <i>Coffea lulandoensis</i> Bridson                                       | Mvungi 2 (DSM, K)                | Tanzania                 | DQ153452         | DQ153701     | DQ153819      | DQ153580                       |
| <i>Coffea macrocarpa</i> A.Rich.                                         | Gueho 18555 (K)                  | Mascarenes (Mauritius)   | DQ153471         | DQ153720     | DQ153838      | DQ153602                       |
| <i>Coffea mapiana</i> Sonké, Nguembou & A.P.Davis                        | Sonké 3694 (K, YA)               | Cameroon                 | DQ153509         | DQ153758     | DQ153876      | DQ153640                       |
| <i>Coffea mauritiana</i> Lam.                                            | Friedmann 1267 (K)               | Mascarenes (Reunion)     | DQ153469         | DQ153718     | DQ153836      | DQ153600                       |
| <i>Coffea mayombensis</i> A.Chev.                                        | Maurin 16 (K)                    | Cameroon                 | DQ153461         | DQ153710     | DQ153828      | DQ153559                       |
| <i>Coffea millotii</i> J.-F.Leroy                                        | Davis 2306 (K)                   | Madagascar               | DQ153409         | DQ153658     | DQ153776      | DQ153529                       |
| <i>Coffea mongensis</i> Bridson                                          | Mvungi 11 (DSM, K)               | Tanzania                 | DQ153448         | DQ153697     | DQ153815      | DQ153576                       |
| <i>Coffea montekupensis</i> Stoff.                                       | Davis 3010 (K)                   | Cameroon                 | DQ153459         | DQ153708     | DQ153826      | DQ153590                       |
| <i>Coffea muftndiensis</i> Hutch. ex Bridson                             | Mvungi 19 (DSM, K)               | Tanzania                 | DQ153449         | DQ153698     | DQ153816      | DQ153577                       |
| <i>Coffea myrtifolia</i> (A.Rich. ex DC.) J.-F.Leroy                     | Jaufeally-Fakim 022 (K)          | Mascarenes (Mauritius)   | DQ153477         | DQ153726     | DQ153844      | DQ153608                       |

**Table 1.** *Continued*

| Taxon                                                                                          | Voucher (and duplicates)             | Source                   | <i>accd-psa1</i> | <i>rpl16</i> | <i>trnL-F</i> | <i>ITS</i>          |
|------------------------------------------------------------------------------------------------|--------------------------------------|--------------------------|------------------|--------------|---------------|---------------------|
| <i>Coffea namorokensis</i> A.P.Davis & Rakotonas. <sup>†</sup>                                 | Davis 2537 (BR, K, P, MO, TAN, TEF)  | Madagascar               | DQ153429         | DQ153678     | DQ153796      | DQ153556            |
| <i>Coffea pocsii</i> Bridson                                                                   | Mvungi 7 (DSM, K)                    | Tanzania                 | DQ153453         | DQ153702     | DQ153820      | DQ153581/DQ153582   |
| <i>Coffea pseudozanguebariae</i> Bridson                                                       | Mvungi 16 (DSM, K)                   | Tanzania                 | DQ153450         | DQ153699     | DQ153817      | DQ153578            |
| <i>Coffea racemosa</i> Lour.                                                                   | Hepper & Maley 7717 (BR, K)          | Mozambique               | DQ153464         | DQ153713     | DQ153831      | DQ153595            |
| <i>Coffea rhamnifolia</i> (Chiov.) Bridson                                                     | Fritis <i>et al.</i> 4908 (K, BR, P) | Somalia                  | DQ153458         | DQ153707     | DQ153825      | DQ153589            |
| <i>Coffea rhamnifolia</i> (Chiov.) Bridson                                                     | O'Brien 23 [+98] (K)                 | Somalia                  | FR828681         | FR828691     | FR832850      | FR832860            |
| <i>Coffea schliebenii</i> Bridson                                                              | Mbago 2256 (DSM)                     | Tanzania                 | DQ153456         | DQ153705     | DQ153823      | DQ153587            |
| <i>Coffea sessiliflora</i> Bridson                                                             | Mvungi 25 (DSM, K)                   | Tanzania                 | DQ153451         | DQ153700     | DQ153818      | DQ153579            |
| <i>Coffea anthonyi</i> Stoff. & F.Anthony                                                      | IRD-Montpelier OE 53 (K)             | DR Congo                 | DQ153489         | DQ153738     | DQ153856      | DQ153620            |
| <i>Coffea stenophylla</i> G. Don                                                               | Hepper & Maley 7723 (K)              | Ivory Coast              | DQ153466         | DQ153715     | DQ153833      | DQ153597            |
| <i>Coffea togoensis</i> Jum. & H.Perrier                                                       | Hall & Abbins 43367 (K)              | Togo                     | DQ153476         | DQ153725     | DQ153843      | DQ153607            |
| <i>Coffea zanguebariae</i> Lour.                                                               | Groenendijk 884 (K)                  | Mozambique               | DQ153475         | DQ153724     | DQ153842      | DQ153606            |
| <i>Psilanthus brassii</i> (J.-F.Leroy) A.P.Davis                                               | Nelder 3824 (BR)                     | Australia                | FR828683         | FR828692     | FR832853      | FR832870            |
| <i>Psilanthus brassii</i> (J.-F.Leroy) A.P.Davis                                               | Fell & Mc Donald 4350 (BRI)          | Australia                | FR828684         | FR828693     | FR832854      | FR832868            |
| <i>Psilanthus bridsoniae</i> Sivar., Biju & P.Mathew                                           | Biju & Sasi 44800 (K)                | India                    | DQ153397         | DQ153646     | DQ153764      | DQ153516            |
| <i>Psilanthus ebracteolatus</i> Heirn                                                          | Davis 3008 (K)                       | Cameroon                 | DQ153392         | DQ153641     | DQ153759      | DQ153510            |
| <i>Psilanthus ebracteolatus</i> Heirn                                                          | (BR 197880061)                       | Upper Guinea             | AM999392         | AM999530     | AM999471      | FR832861 + FR832862 |
| <i>Psilanthus lebrunianus</i> (Germ. & Kesler) Bridson                                         | Breyne 2985 (BR)                     | DR Congo                 | FR828686         | FR828695     | FR832852      | FR832864            |
| <i>Psilanthus lebrunianus</i> (Germ. & Kesler) Bridson                                         | Evrard 6322 (BR)                     | DR Congo                 | FR828685         | FR828694     | FR832851      | FR832863            |
| <i>Psilanthus mannii</i> Hook.f.                                                               | Maurin 1 (K)                         | Cameroon                 | DQ153393         | DQ153642     | DQ153760      | DQ153511            |
| <i>Psilanthus mannii</i> Hook.f.                                                               | Davis 3061 (K)                       | Cameroon                 | FR828687         | FR828696     | FR832856      | FR832866            |
| <i>Psilanthus mannii</i> Hook.f.                                                               | Harris 6958 (E)                      | Central African Republic | DQ180518         | DQ180553     | DQ180587      | FR832865            |
| <i>Psilanthus melanocarpus</i> (Welw. ex Hiern) J.-F.Leroy                                     | Hallé 6469 (BR, K)                   | Angola                   | FR828688         | FR828697     | N/A           | N/A                 |
| <i>Psilanthus sapinii</i> De Wild.                                                             | Sapin. <i>s.n.</i> (BR 0856914)      | DR Congo                 | DQ153394         | DQ153643     | DQ153761      | DQ153512            |
| <i>Psilanthus semsei</i> Bridson                                                               | Kisera 1473 (K)                      | Tanzania                 | DQ153395         | DQ153644     | DQ153762      | DQ153513            |
| <i>Psilanthus</i> sp. 'A' (FTEA)                                                               | Luke 10197 (K)                       | Tanzania                 | DQ153399         | DQ153648     | DQ153766      | DQ153518            |
| <i>Psilanthus merguensis</i> (Ridl.) J.-F.Leroy                                                | Gardner & Sidisunthorn 315 (K)       | Thailand                 | FR828689         | FR828698     | FR832855      | FR832867            |
| <i>Psilanthus travancorensis</i> (Wight & Arn.) J.-F.Leroy                                     | Biju <i>s.n.</i> (K)                 | India                    | DQ153398         | DQ153647     | DQ153765      | DQ153517            |
| <i>Tricalysia cryptocalyx</i> Baker                                                            | Davis 2173 [b] (BR, K)               | Madagascar               | DQ153400         | DQ153649     | DQ153767      | DQ153519            |
| <i>Tricalysia perrieri</i> Ranariv. & De Block subsp. <i>antsalovensis</i> Ranariv. & De Block | Davis 2325 (BR, K)                   | Madagascar               | DQ180528         | DQ180562     | DQ180597      | FR832858            |
| <i>Tricalysia dauphinensis</i> Ranariv. & De Block                                             | OKTAN 68 (K)                         | Madagascar               | DQ180529         | DQ180563     | DQ180598      | FR832859            |

Notes:

\*Acceptance as a separate species pending. Considered a synonym of *C. mauritiana* by Davis *et al.* (2006).<sup>†</sup>As *C. decaryana* J.-F. Leroy in Maurin *et al.* (2007).



carded as burn-in and the remaining trees were summarized in a 50% majority rule consensus tree using PAUP\* ver. 4.0b10 to obtain posterior probabilities.

## RESULTS

### SINGLE AND COMBINED PLASTID ANALYSES

Individual plastid analyses, (1) *trnL-F*, (2) *rpl16* and (3) *accD-psa1*, were topologically consistent (negligible to zero incongruence) and so were combined and treated as a single analysis. The combined plastid data set contained a total of 2981 characters, of which 2719 were constant, 122 were variable but parsimony uninformative, and 140 were potentially parsimony informative. Using parsimony analysis, the combined data set produced 98 140 equally parsimonious trees. A 50% majority rule Bayesian consensus tree with bootstrap values is shown in Figure 1. The following clades (excluding species and two-species sister-pairs) are well supported [BP  $\geq$  85/Bayesian posterior probability (BPP) 1.0] under parsimony and Bayesian analysis (clade terminology follows Maurin *et al.*, 2007; see above): *Coffea* and *Psilanthus* (all terminals in the analysis, less *Tricalysia*), BP 100/BPP 1.0; a group of African *Psilanthus* (*P. mannii*, *P. sapinii*, *P. semsei*, *P. sp. 'A'* (FTEA), *P. ebracteolatus* (both samples: Cameroon and Upper Guinea), *P. melanocarpus*), BP 85/BPP 1.0; *Psilanthus* subgenus *Psilanthus* (*P. mannii* and *P. sapinii*), BP 98/BPP 1.0; Asian and Australian *Psilanthus* species (*P. bridsoniae*, *P. travancorensis*, *P. merguensis*, *P. brassii*), BP 91/BPP 1.0; the LG/C clade [*C. charrieriana*, *C. montekupensis* Stoff., *C. canephora* Pierre ex A.Froehner, *C. heterocalyx* Stoff., *C. congensis* A.Froehner, *C. brevipes*, *C. mayombensis* A.Chev., *C. kapakata* (A.Chev.)Bridson, *C. liberica* Bull. ex Hiern (var. *liberica* and var. *dewevrei* (De Wild. & T.Durand) Lebrun), *C. bakossi* Cheek & Bridson, *C. mapihana* Sonké, Nguembou & A.P. Davis], BP 82/BPP 1.0; the EC-Afr clade (*C. anthonyi* Stoff. & F.Anthony, *C. eugenioides* S.Moore, *C. kivuensis* Lebrun), including *C. arabica*, BP 100/BPP 1.0; the UG clade (*C. stenophylla* G.Don, *C. humilis* A.Chev., *C. togoensis* A.Chev.), BP 100/BPP 1.0; a group of predominately lowland to mid-latitude East African coffee species (*C. pseudozanguebariae* Bridson, *C. bridsoniae* A.P.Davis & Mvungi, *C. sessiliflora* Bridson, *C. costatifructa* Bridson, *C. pocsii* Bridson, *C. schliebenii* Bridson, *C. racemosa*, *C. salvatrix* Swynn. & Philipson), BP 85/BPP 1.0; a group of species from the Udzungwa Mountains in Tanzania (*C. mufindiensis* Hutch. ex Bridson subsp. *mufindiensis*, *C. lulandoensis* Bridson, *C. kihansiensis* A.P.Davis & Mvungi) BP 92/BPP 1.0; the EC-Afr clade, the UG clade and East African species listed directly above form a larger clade, BP 90/BPP 1.0; the MAS clade

(*C. mauritiana* Lam., *C. campaniensis* J.-F.Leroy, *C. macrocarpa* A.Rich., *C. myrtifolia* (A.Rich. ex DC.) J.-F.Leroy), BP 90/1.0; and the *Baracoffea* alliance (*C. labatii* A.P.Davis & Rakotonas., *C. humbertii* J.-F.Leroy, *C. grevei* Drake ex A.Chev., *C. ambongensis* A.P.Davis & Rakotonas., *C. boinensis* A.P.Davis & Rakotonas., *C. pterocarpa* A.P.Davis & Rakotonas., *C. namorokensis* A.P.Davis & Rakotonas.), BP 95/BPP 1.0, which has two other well-supported clades within the alliance.

There is no substantial support for the positions of the *Psilanthus* clades and *Psilanthus* spp. in relation to *Coffea*; in the strict consensus tree (not shown) they are unresolved at the base of the ingroup. *Psilanthus melanocarpus* is placed confidently within the African *Psilanthus* clade (see Fig. 1 and above), with two species of *Psilanthus* from the Udzungwa Mountains in Tanzania [*P. semsei*, *P. sp. 'A'* (FTEA)], although this relationship is not well supported (BP 55/BPP 0.86).

### ITS ANALYSIS

The ITS matrix contained a total of 788 characters, of which 600 were constant, 64 were variable but parsimony uninformative and 124 were potentially parsimony informative. Using parsimony analysis, the combined data set produced 78 608 equally parsimonious trees. A 50% majority-rule Bayesian consensus tree with bootstrap values is shown in Figure 2. The following clades (excluding species and two-species sister-pairs) are well supported (BP  $\geq$  85/BPP 1.0) under parsimony and Bayesian analysis (clade terminology follows Maurin *et al.*, 2007; see above): *Coffea* and *Psilanthus* (all terminals in the analysis, less *Tricalysia*), BP 100/BPP 1.0; Asian and Australian *Psilanthus* spp. (*P. bridsoniae*, *P. travancorensis*, *P. merguensis*, *P. brassii*), BP 83/BPP 1.0; the EC-Afr clade (*C. anthonyi*, *C. eugenioides*, *C. kivuensis*), BP 88/BPP 1.0; a LG/C group of species (*C. canephora*, *C. heterocalyx*, *C. congensis*, *C. brevipes*, *C. mayombensis*, *C. kapakata*), including *C. arabica*, BP 93/BPP 1.0, but lacking five of the other LG/C species [*C. liberica* (var. *liberica* and var. *dewevrei*), *C. charrieriana*, *C. montekupensis*, *C. bakossi*, *C. mapihana*] present in the LG/C clade based on the combined plastid data; a group of species from the Udzungwa Mountains in Tanzania (*C. mufindiensis* subsp. *mufindiensis*, *C. lulandoensis*, *C. kihansiensis*), BP 86/BPP 0.98; and the MAS clade (*C. mauritiana*, *C. myrtifolia*, *C. campaniensis*), BP 98/BPP 1.0. For comparison with the combined plastid analysis, weak to moderately supported groups include: the UG clade (*C. stenophylla*, *C. humilis*, *C. togoensis*), BP 56/BPP 0.91; the UG clade is sister the LG/C species group enumerated above, BP 80/BPP 1.0; and the

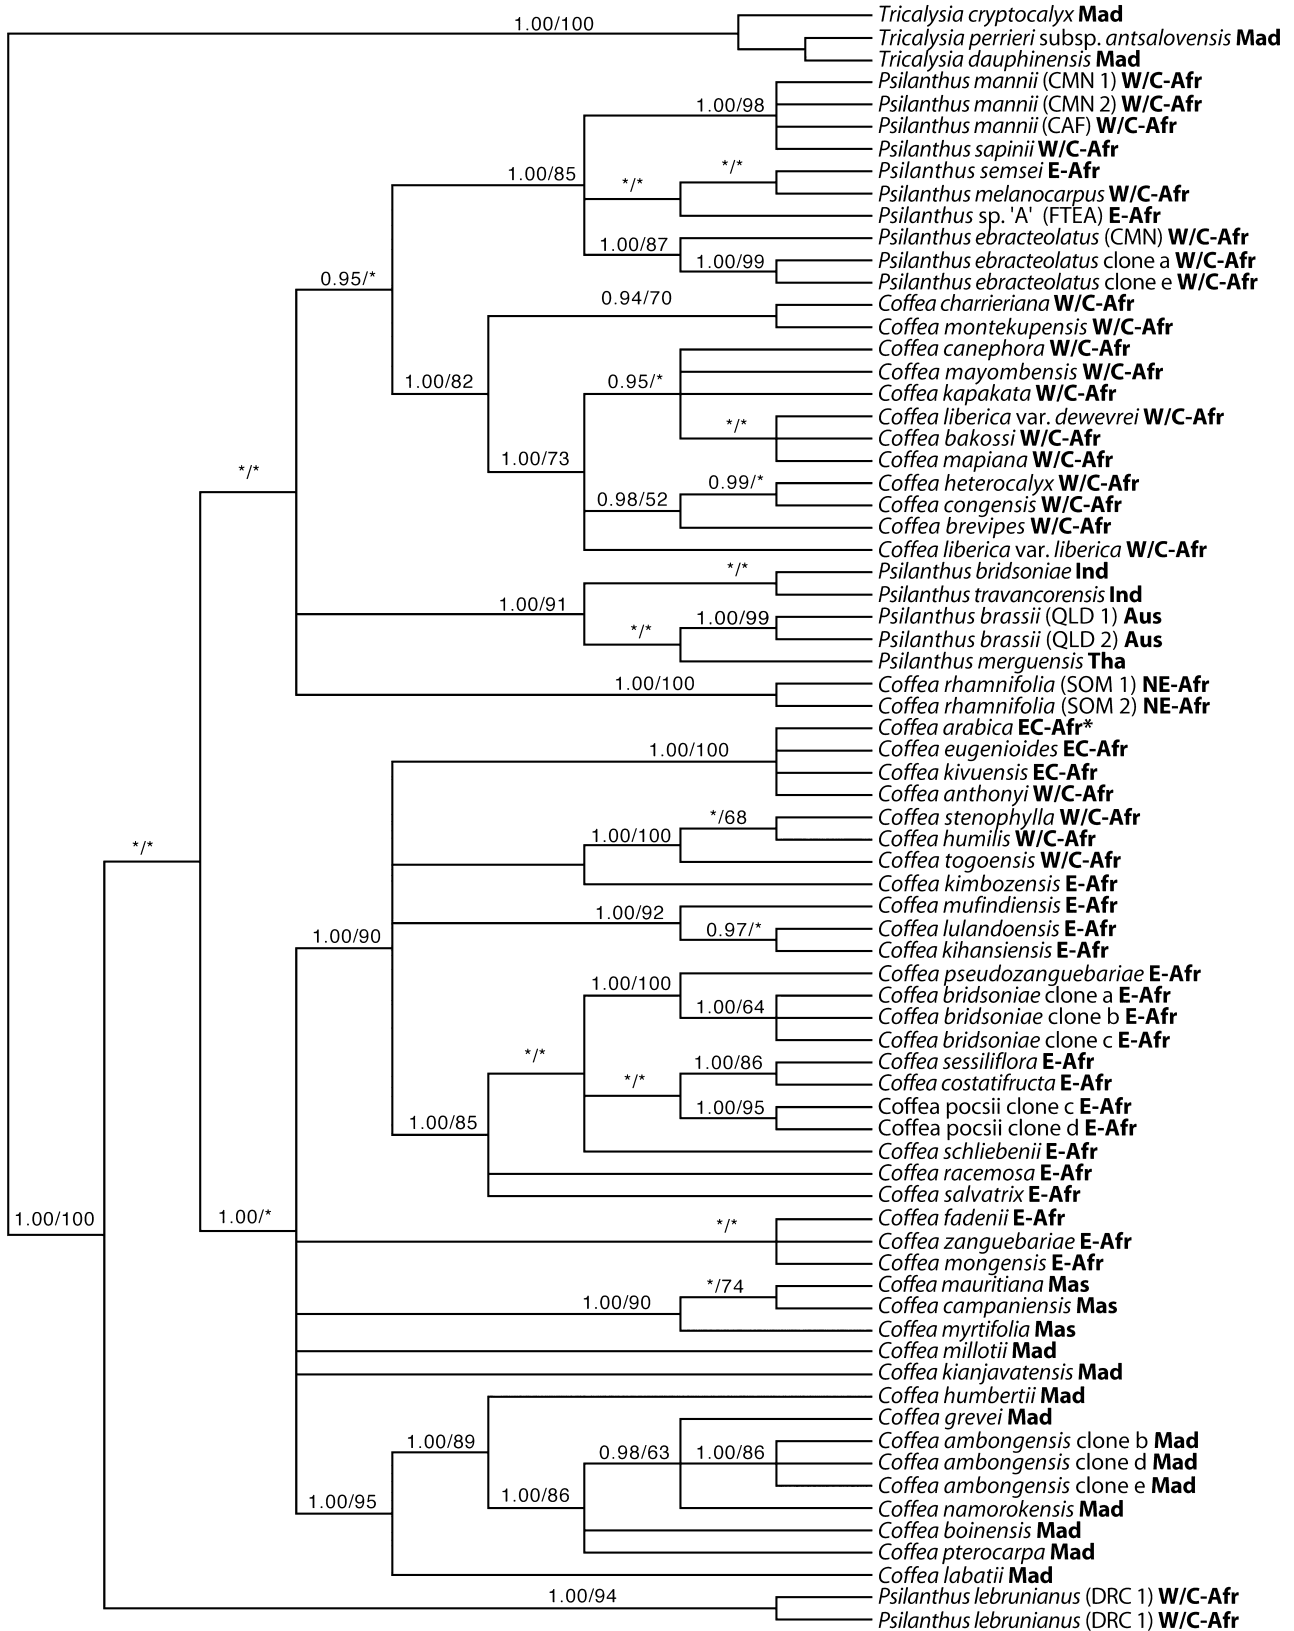

**Figure 1.** Plastid Bayesian majority rule consensus tree, based on 1500 trees. Bayesian posterior probabilities and bootstrap values > 50% are indicated above branches (BPP/BP); Asterisks denote Bayesian posterior probabilities < 0.95 and bootstrap values < 50%. See Table 1 for species authorities and provenance. Region and country abbreviations: Aus, Australia; CAF, Central African Republic; CMN, Cameroon; DRC, Democratic Republic of Congo; E-Afr, East Africa; EC-Afr, East–Central Africa; Ind, India; Mad, Madagascar; Mas, Mascarenes; NE-Afr, North-eastern Africa; QLD, Queensland (Australia); SOM, Somalia; Tha, Thailand; W/C-Afr, West and Central Africa (Guineo-Congolian Regional Centre of Endemism; White, 1983). Other abbreviation: FTEA (*Flora of Tropical East Africa*; Bridson, 1988a).

*Baracoffea* alliance (*C. humbertii*, *C. grevei*, *C. ambongensis*, *C. boinensis*, *C. namorokensis*, *C. labatii*), but without *C. pterocarpa*, BP 65/BPP 0.98.

There is no substantial support for the positions of the *Psilanthus* clades and *Psilanthus* species in relation to *Coffea*, although in the strict consensus tree (not shown) Asian and Australian *Psilanthus* spp. are sister to the rest of *Coffea* + *Psilanthus* (less *C. rhamnifolia* and *C. charrieriana*), and African *Psilanthus* spp. remain positioned within a clade of African *Coffea* species. Thus, there is evidence in the ITS analysis that *Coffea* is polyphyletic if *Psilanthus* is recognized as a separate genus. We could not produce a complete or usable sequence for *P. melanocarpus* and so this species was not included in the ITS analysis.

#### COMBINED TOTAL PLASTID–ITS ANALYSIS

The relationships retrieved in the combined plastid analysis vs. the ITS analysis are not in serious conflict, but there are two notable incongruencies. Firstly, *C. arabica*, which is known to be a hybrid between *C. canephora* and *C. eugenioides* (Lashermes *et al.*, 1999; Maurin *et al.*, 2007): in the ITS analysis it is sister to *C. canephora* (BP 68/BPP 1.0), within a clade of several LG/C species; and in the combined plastid analysis it is confidently placed (BP 100/BPP 1.0) in an unresolved position within the EC-Afr clade (*C. kivuensis*, *C. anthonyi*, *C. eugenioides*). *Coffea arabica* was removed from the combined total plastid–ITS analysis. The second obvious incongruence is the UG clade, which falls within a clade containing the EC-Afr clade and East African species in the combined plastid analysis (BP 90/BPP 1.0), but in contrast is retrieved as a sister group to several LG/C species in the ITS analysis (BP 80/BPP 1.0). As reported by Maurin *et al.* (2007), removal or retention of the UG clade in the combined total plastid–ITS analysis does not significantly influence the topology, and for this reason it was retained.

The total combined plastid–ITS analysis retrieved the following well-supported clades, as shown in Figure 3. The following clades (excluding species and two-species sister-pairs) are well supported (BP > 85/BPP 1.0) under parsimony and Bayesian analysis (clade terminology follows Maurin *et al.*, 2007; see above): *Coffea* and *Psilanthus* (all terminals in the

analysis, less *Tricalysia*), BP 100/BPP 1.0; a group of African *Psilanthus* spp. (*P. mannii*, *P. sapinii*, *P. melanocarpus*, *P. semsei*, *P. sp. 'A'* (FTEA), *P. ebracteolatus* (two samples), BP 82/BPP 1.0; *Psilanthus* subgenus *Psilanthus* (*P. mannii* and *P. sapinii*), BP 98/BPP 1.0; Asian and Australian *Psilanthus* species (*P. bridsoniae*, *P. travancorensis*, *P. merguensis*, *P. brassii*), BP 100/BPP 1.0; the LG/C clade (*C. charrieriana*, *C. canephora*, *C. heterocalyx*, *C. congensis*, *C. brevipes*, *C. mayombensis*, *C. kapakata*, *C. liberica* (var. *liberica* and var. *dewevrei*), *C. montekupensis*, *C. bakossi*, *C. mapiana*, BP 61/BPP 1.0 (without *C. charrieriana*, BP 76;BPP 1.0); within the LG/C clade, less *C. charrieriana*) there are two further well-supported clades: the *canephora* alliance (*C. canephora*, *C. heterocalyx*, *C. congensis*, *C. brevipes*, *C. kapakata*, *C. mayombensis*; BP 98/BPP 1.0) and a clade which we call the '*liberica* alliance' [*C. liberica* (var. *liberica* and var. *dewevrei*), *C. montekupensis*, *C. bakossi*, *C. mapiana*, BP 67/BPP 1.0]; the UG clade (*C. stenophylla*, *C. humilis*, *C. togoensis*), BP 100/BPP 1.0; the A/IO clade, BP <50; BPP 1.0; the EC-Afr clade (*C. eugenioides*, *C. kivuensis*, *C. anthonyi*), BP 100/BPP 1.0; a group of species from the Udzungwa Mountains in Tanzania (*C. mufindiensis* subsp. *mufindiensis*, *C. lulandoensis*, *C. kihansiensis*), BP 100/BPP 1.0; the EC-Afr clade and the UG clade are sister to two groups of lowland East African (EA) species: (1) *C. pseudozanguebariae*, *C. bridsoniae*, *C. schliebenii*, *C. salvatrix*, BP 79/BPP 0.72 and (2) *C. sessiliflora*, *C. costatifructa*, *C. pocsii*, *C. racemosa*, BP 97/BPP 1.0; the UG + EC-Afr + EA clade has support value of BP 64/BPP = 1.0; a group of three species from the Eastern Arc Mountains, referred to by Maurin *et al.* (2007), as the '*mongensis* alliance' (*C. fadenii* Bridson, *C. zanguebariae* Bridson, *C. mongensis* Bridson), BP 86/BPP 1.0; the MAS clade (*C. mauritiana*, *C. campaniensis*, *C. myrtifolia*), BP 100/BPP 1.0; the IO clade, BP 63/BPP 0.99; and the *Baracoffea* alliance (*C. labatii*, *C. humbertii*, *C. grevei*, *C. ambongensis*, *C. boinensis*, *C. pterocarpa*, *C. namorokensis*), BP 99/BPP 1.0.

In the strict consensus tree there is no resolution for the positions of the *Psilanthus* clades, although *C. rhamnifolia* (Somalia) is consistently retrieved as sister to the Asian and Australian *Psilanthus* clade (Figs 1, 3). *Psilanthus melanocarpus* is placed within

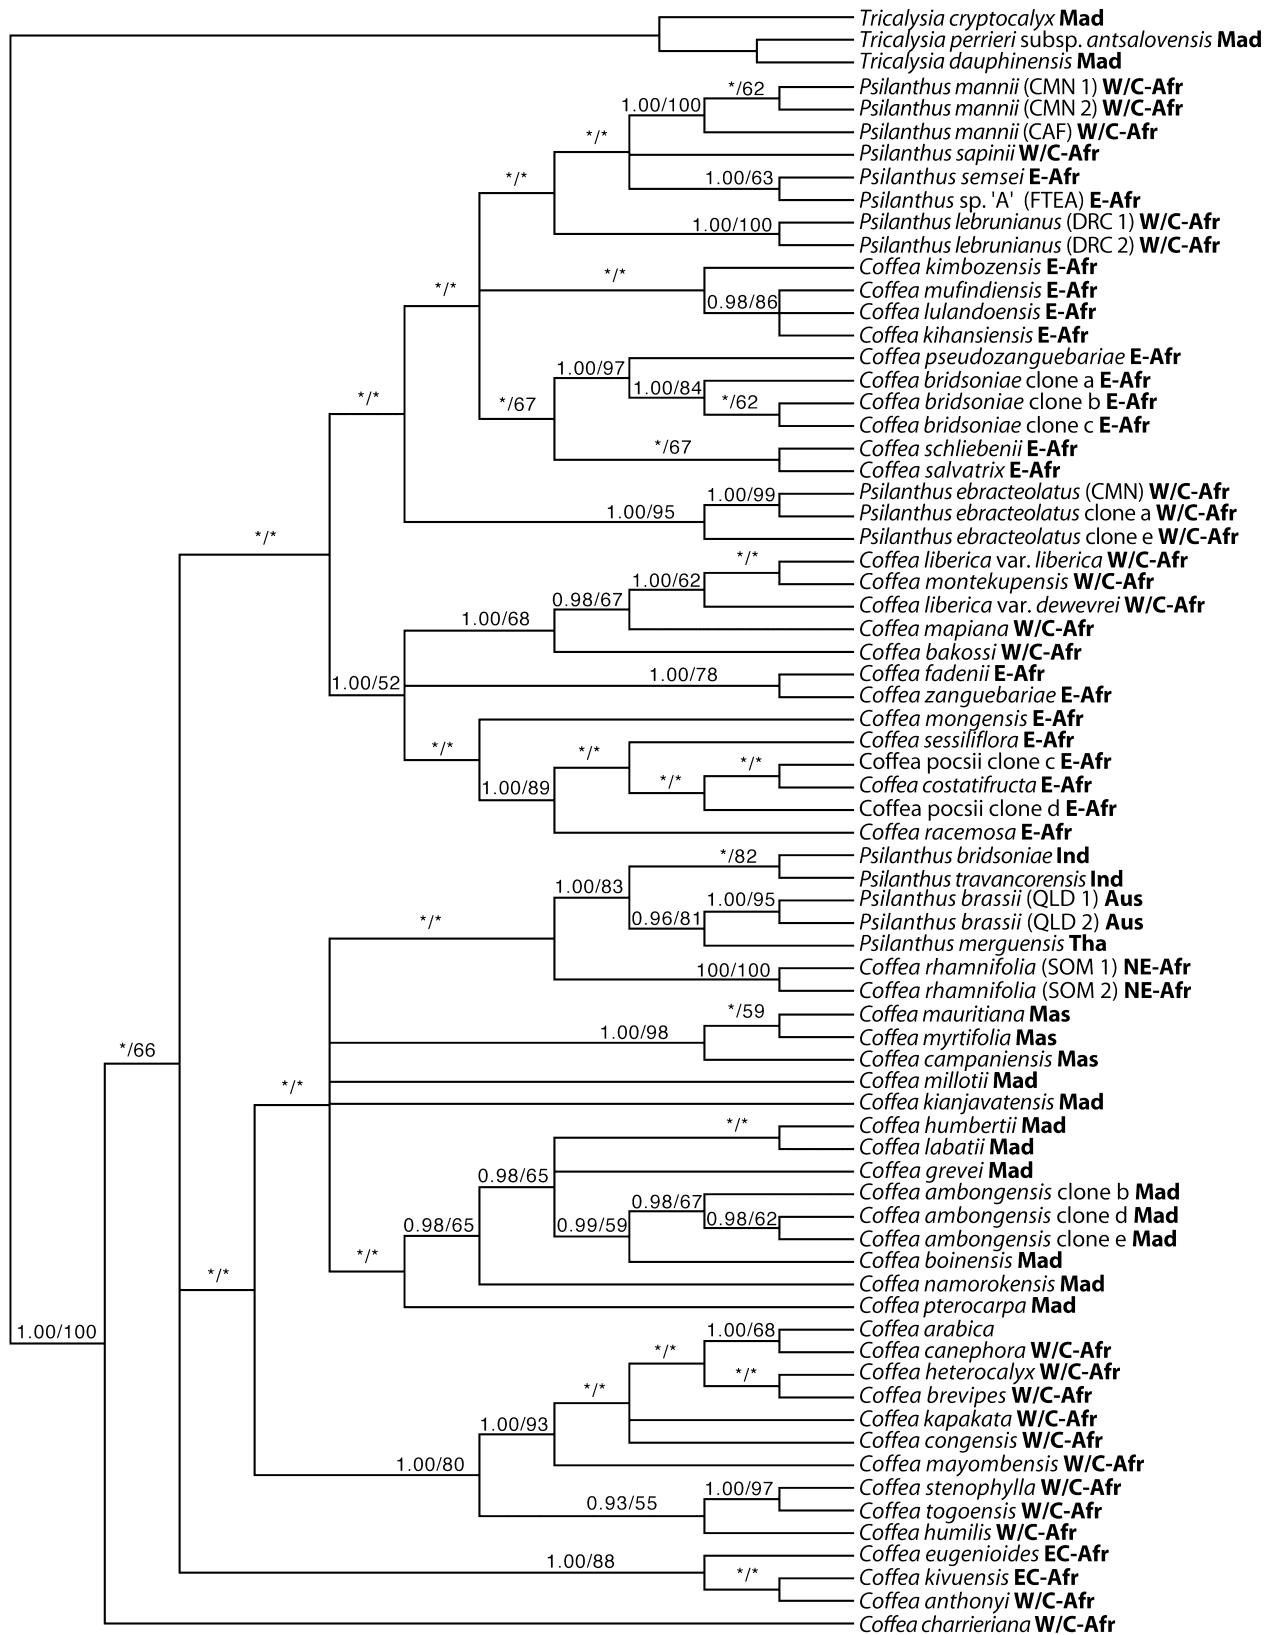

**Figure 2.** Internal transcribed spacer (ITS) Bayesian majority rule consensus tree, based on 1500 trees. Bayesian posterior probabilities and bootstrap values > 50% are indicated above branches (BPP/BP); Asterisks denote Bayesian posterior probabilities < 0.95 and bootstrap values < 50%. See Table 1 for species authorities and provenance. Region and country abbreviations: Aus, Australia; CAF, Central African Republic; CMN, Cameroon; DRC, Democratic Republic of Congo; E-Afr, East Africa; EC-Afr, East–Central Africa; Ind, India; Mad, Madagascar; Mas, Mascarenes; NE-Afr, North-eastern Africa; QLD, Queensland (Australia); SOM, Somalia; Tha, Thailand; W/C-Afr, West and Central Africa (Guineo-Congolian Regional Centre of Endemism; White, 1983). Other abbreviation: FTEA (*Flora of Tropical East Africa*; Bridson, 1988a).

the African *Psilanthus* clade, within a clade (BP < 50/ BPP 0.99) containing two *Psilanthus* spp. from the Udzungwa Mountains in Tanzania [*P. semsei*, *P. sp. 'A'* (FTEA)].

## DISCUSSION

### EVIDENCE SUPPORTING THE INCLUSION OF *PSILANTHUS* SPECIES WITHIN *COFFEA*

To date, the most comprehensive molecular study into the relationships between *Coffea* and *Psilanthus* has been undertaken by Maurin *et al.* (2007). They examined 84 species of *Coffea* and seven species of *Psilanthus* (including *P. sp. 'A'* (FTEA)). In the analyses presented here, we enlarge the sampling of *Psilanthus* with the addition of four newly sequenced species [*P. brassii* (Australia), *P. melanocarpus* (Angola), *P. lebrunianus* (West and Central Africa) and *P. merguensis* (Thailand)], in combination with a broad representation of *Coffea* spp. from the study of Maurin *et al.* (2007), and an additional species of *Coffea* (*C. charrieriana*). These additional species of *Psilanthus* provide a more comprehensive taxonomic and geographical sampling of the genus and include the problematic *P. melanocarpus*, a species that has been difficult to place based on morphological grounds (Leroy, 1980a, b; Andreasen & Bremer, 1996; Davis *et al.*, 2005, 2007; Maurin *et al.*, 2007).

Our results confirm previous studies (Lashermes *et al.*, 1997; Cros *et al.*, 1998; Davis *et al.*, 2007; Maurin *et al.*, 2007) showing that the level of sequence divergence between *Coffea* and *Psilanthus* spp. is negligible, particularly given the much longer branch lengths separating other genera of tribe Coffeeae (Davis *et al.*, 2007; Tosh *et al.*, 2009). There are also indications that *Psilanthus* is biphyletic, as inferred by the ITS data (Fig. 2). The combined plastid data shows that the morphologically incongruous *P. melanocarpus* falls within the ingroup, as part of a clade of African *Psilanthus* spp. (Fig. 1). In contrast to other species of *Psilanthus*, *P. melanocarpus* has short filaments and sub-medifixed anthers, as in *Coffea*, but an included style, as in *Psilanthus*. Now that we have demonstrated that *P. melanocarpus* falls within a group of African *Psilanthus*, only one character separates *Coffea* from *Psilanthus*: a long, emer-

gent vs. a short, included style. As a character for generic delimitation, this is insubstantial, particularly as *Coffea* and *Psilanthus* are morphologically similar and share several synapomorphies (Davis *et al.*, 2005, 2007). According to Davis *et al.* (2007), *Coffea* and *Psilanthus* are supported by the apparent loss of secondary pollen presentation, the presence of a hard (horny/crustaceous) endocarp (pyrene), seeds (and endocarp) with a deep ventral groove and a seed coat consisting of crushed endotestal cells and more or less isolated fibres. The hard crustaceous endocarp of the pyrene and the ventral excavation of pyrene and seed, in combination with shape and size, give the typical 'coffee bean' morphology of *Coffea* (including *Psilanthus* spp.). This synapomorphy is unambiguously unique in Coffeeae (Davis *et al.*, 2007) and in Rubiaceae.

Given the above results, in combination with cytogenetic similarity (Lombello & Pinto-Maglio, 2003, 2004) and the ability to produce fertile intergeneric hybrids (Couturon *et al.*, 1998), *Coffea* and *Psilanthus* should be treated as a single generic entity. The earliest published name is *Coffea* (Linnaeus, 1753), which predates *Psilanthus* (1873a) and has priority according to the *International Code of Botanical Nomenclature* (ICBN; McNeill *et al.*, 2006). This decision is hardly controversial given the systematic evidence presented here, the convoluted taxonomic and systematic history of *Psilanthus* in relation to *Coffea* (see Introduction) and the fact that many workers already consider that coffee trees should belong to a single genus (e.g. Lashermes *et al.*, 1997; Cros *et al.*, 1998; Maurin *et al.*, 2007). For many coffee researchers, this would make perfect sense, given that *Psilanthus* spp. have been used by local people and growers to make the beverage coffee (Cheney, 1925; Wellman, 1961; Burkill, 1997).

### A NEW CIRCUMSCRIPTION FOR *COFFEA*: MORE SPECIES, AN INCREASE IN GEOGRAPHICAL AND ECOLOGICAL RANGE AND A BROADER MORPHOLOGICAL CHARACTERIZATION

In line with the title of this contribution, the transfer of *Psilanthus* spp. to *Coffea* increases the number of species in that genus from 104 (Davis *et al.*, 2006;

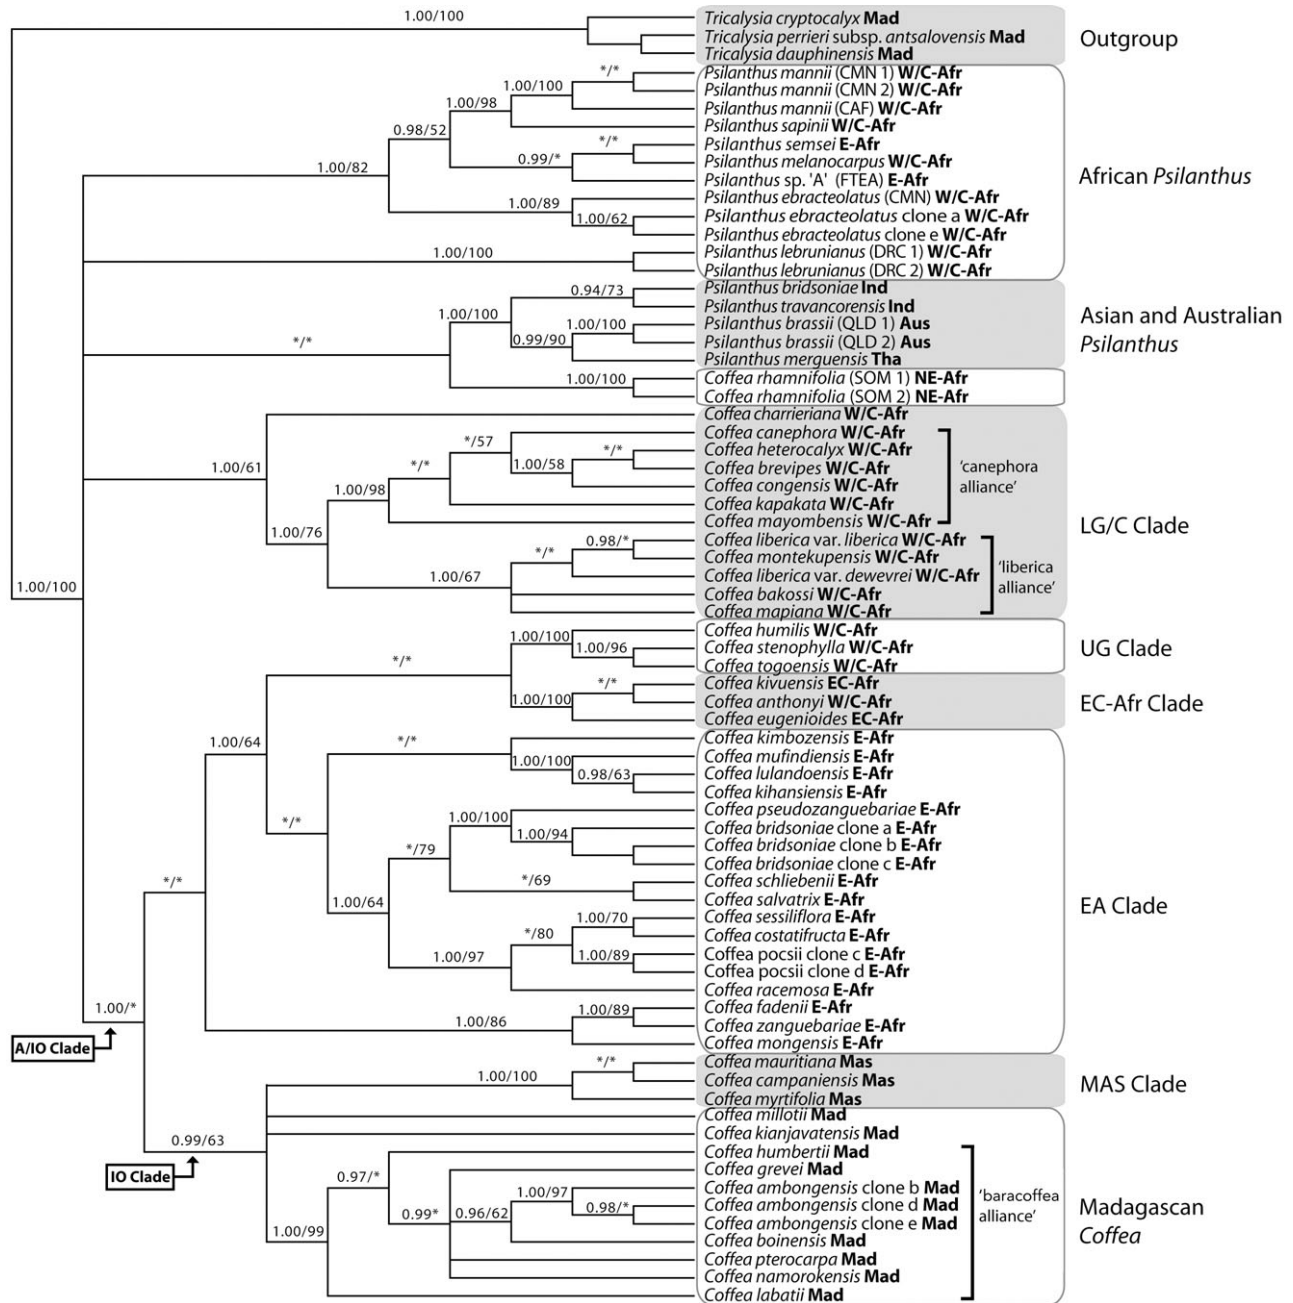

**Figure 3.** Combined plastid-internal transcribed spacer (ITS) Bayesian majority rule consensus tree, based on 1500 trees. Bayesian posterior probabilities and bootstrap values > 50% are indicated above branches (BPP/BP); Asterisks denote Bayesian posterior probabilities < 0.95 and bootstrap values < 50%. See Table 1 for species authorities and provenance. Clades: EA Clade, East African Clade; EC-Afr clade, East-Central African Clade; LG/C Clade, Lower Guinea/Congolian Clade; UG Clade, Upper Guinea Clade; A/I/O Clade, Africa/Indian Ocean Clade; IO Clade, Indian Ocean Clade. MAS Clade, Mascarene Clade. Region and country abbreviations: Aus, Australia; CAF, Central African Republic; CMN, Cameroon; DRC, Democratic Republic of Congo; E-Afr, East Africa; EC-Afr, East-Central Africa; Ind, India; Mad, Madagascar; Mas, Mascarenes; NE-Afr, North-eastern Africa; QLD, Queensland (Australia); SOM, Somalia; Tha, Thailand; W/C-Afr, West and Central Africa (Guineo-Congolian Regional Centre of Endemism; White, 1983). Other abbreviation: FTEA (*Flora of Tropical East Africa*; Bridson, 1988a).

Davis, Rakotonasolo & De Block, 2010) to 124 species. The new combinations and new names necessary for the transfer of *Psilanthus* to *Coffea* have been made in anticipation of this contribution (Davis, 2010, 2011). Work in progress (A. Davis, pers. observ.) shows that, with the addition of new species from Africa and Madagascar, the number of *Coffea* spp. will soon reach 130.

The placement of *Psilanthus* spp. in *Coffea* considerably increases the geographical range of *Coffea*. Before the inclusion of *Psilanthus*, *Coffea* was restricted to tropical Africa, Madagascar, the Comoros and the Mascarenes. It now also occurs in southern Asia (Indian subcontinent), south tropical Asia (Cambodia, Myanmar, Thailand, Vietnam), south-eastern Asia (Java, Lesser Sunda Islands, Philippines, Papua New Guinea) and Australasia (Australia: Queensland). The ecological range of the genus is also extended, to include habitats previously not recorded for *Coffea*, including subtropical vegetation of higher latitudes (northern India, Nepal and Bhutan) and semi-deciduous microphyll vine forest (northern Queensland, Australia; Forster, 2004). A simplified distribution map for *Coffea* is presented in Figure 4.

The current morphological concept of *Coffea* (Bridson, 1988a, b, 2003; Stoffelen, 1998; Davis *et al.*, 2005) also requires updating to include characters formerly restricted to *Psilanthus*: calyx lobes accrescent; anthers sessile or filaments short (0.5 mm long); anthers supramedifixed; anthers mostly or fully included; anthers with sterile appendages; style short (stigma lobes distinctly below anthers, often positioned at the base of the corolla tube); pollen apertures four or five. A new generic characterization of *Coffea*, plus an annotated enumeration of species formerly included in *Psilanthus*, following the format of Davis *et al.* (2006), is in preparation (A. Davis, P. Stoffelen & S. Dawson, unpubl. data). An overview of the currently accepted names of species formerly placed in *Psilanthus*, with their geographical distribution, is given in Appendix 1.

Our analyses show that the LG/C clade contains a group worthy of informal recognition, as the 'liberica alliance', which, like the 'canephora alliance', contains an assemblage of species that are closely related to a crop species (crop wild relatives: CWR), in this case *C. liberica* (see Fig. 3). In his treatment of *Coffea* spp. from the Congo, Lebrun (1941) recognized 'series Libericae', comprising a single species (*C. liberica*). Lebrun used morphological characteristics to distinguish 'series Libericae' from other groups of *Coffea* from the Lower Guinea/Congolian area. It would be worthwhile re-examining these morphological characters in order to assess their systematic and diagnostic value.

Given the apparent complicated evolutionary history of *Coffea* (including *Psilanthus*) and the lack of support for major groupings or previous classifications within the genus, it is not possible to propose a formal infrageneric classification at this time.

#### IMPLICATIONS FOR UNDERSTANDING THE EVOLUTIONARY HISTORY OF *COFFEA*

The inclusion of *Psilanthus* spp. in *Coffea* complicates our understanding of the evolutionary history of *Coffea*. Simplified hypotheses describing the evolutionary 'dispersal' of *Coffea* across and out of Africa (e.g. Leroy, 1982; Anthony *et al.*, 2010, fig. 4) will now have to be reassessed. Firstly, our data show that the origin and diversification of *Coffea*, even within Africa, is more complicated than originally assumed (Maurin *et al.*, 2007) and that there have been at least two separate dispersals out of Africa. The nested position of the Tanzanian *Psilanthus* spp., *P. semsei* and *P. sp. 'A'* (FTEA), within a West and Central African (Guineo-Congolian) clade and the incongruous position of the UG clade (i.e. in the plastid vs. ITS analyses) suggests interplay between West and Central Africa and East Africa on either side of the Albertine African Rift Valley. This can be explained either by dispersals across Africa or by some species having previously more extensive ranges (which was followed by fragmentation and reduction), or a mixture of both. Secondly, the position of the Asian *Psilanthus* clade (*P. bridsoniae*, *P. travancorensis*, *P. merguensis*, *P. brassii*) in our analyses suggests an origin in Africa (Figs 1–3), with a consistently retrieved but poorly supported sister relationship with *C. rhamnifolia* (Figs 2, 3). *Coffea rhamnifolia* is from dry, low altitude shrub lands in Somalia and north-east Kenya; Asian/Australasian *Psilanthus* spp. are from seasonal humid tropical or seasonal subtropical vegetation types, including deciduous forest types, in India, southern tropical Asia, south-east Asia, Papua New Guinea and Australia. This suggests an African dry biome as an ancestral refugia for *Coffea*, similar to those demonstrated by Schrire *et al.* (2009) in studies of the tribe Indigofereae Benth. (Fabaceae). In a recent study of *Livistona* R.Br. (Arecaceae), Crisp *et al.* (2010) show that *L. carinensis* (Chiov.) J.Dransf. & N.W.Uhl, from dry habitats in Somalia, Yemen and Djibouti, is sister to lineages in Asia and Australasia, mostly containing species from humid, tropical biomes, which is similar to the relationship retrieved for *C. rhamnifolia* and Asian/Australasian *Psilanthus*. White & Léonard (1991) clearly demonstrated strong phytochorial links between north-western Africa, Arabia and western India, which may have assisted the dispersal of *Coffea* from Africa to south-west Asia, although oceanic

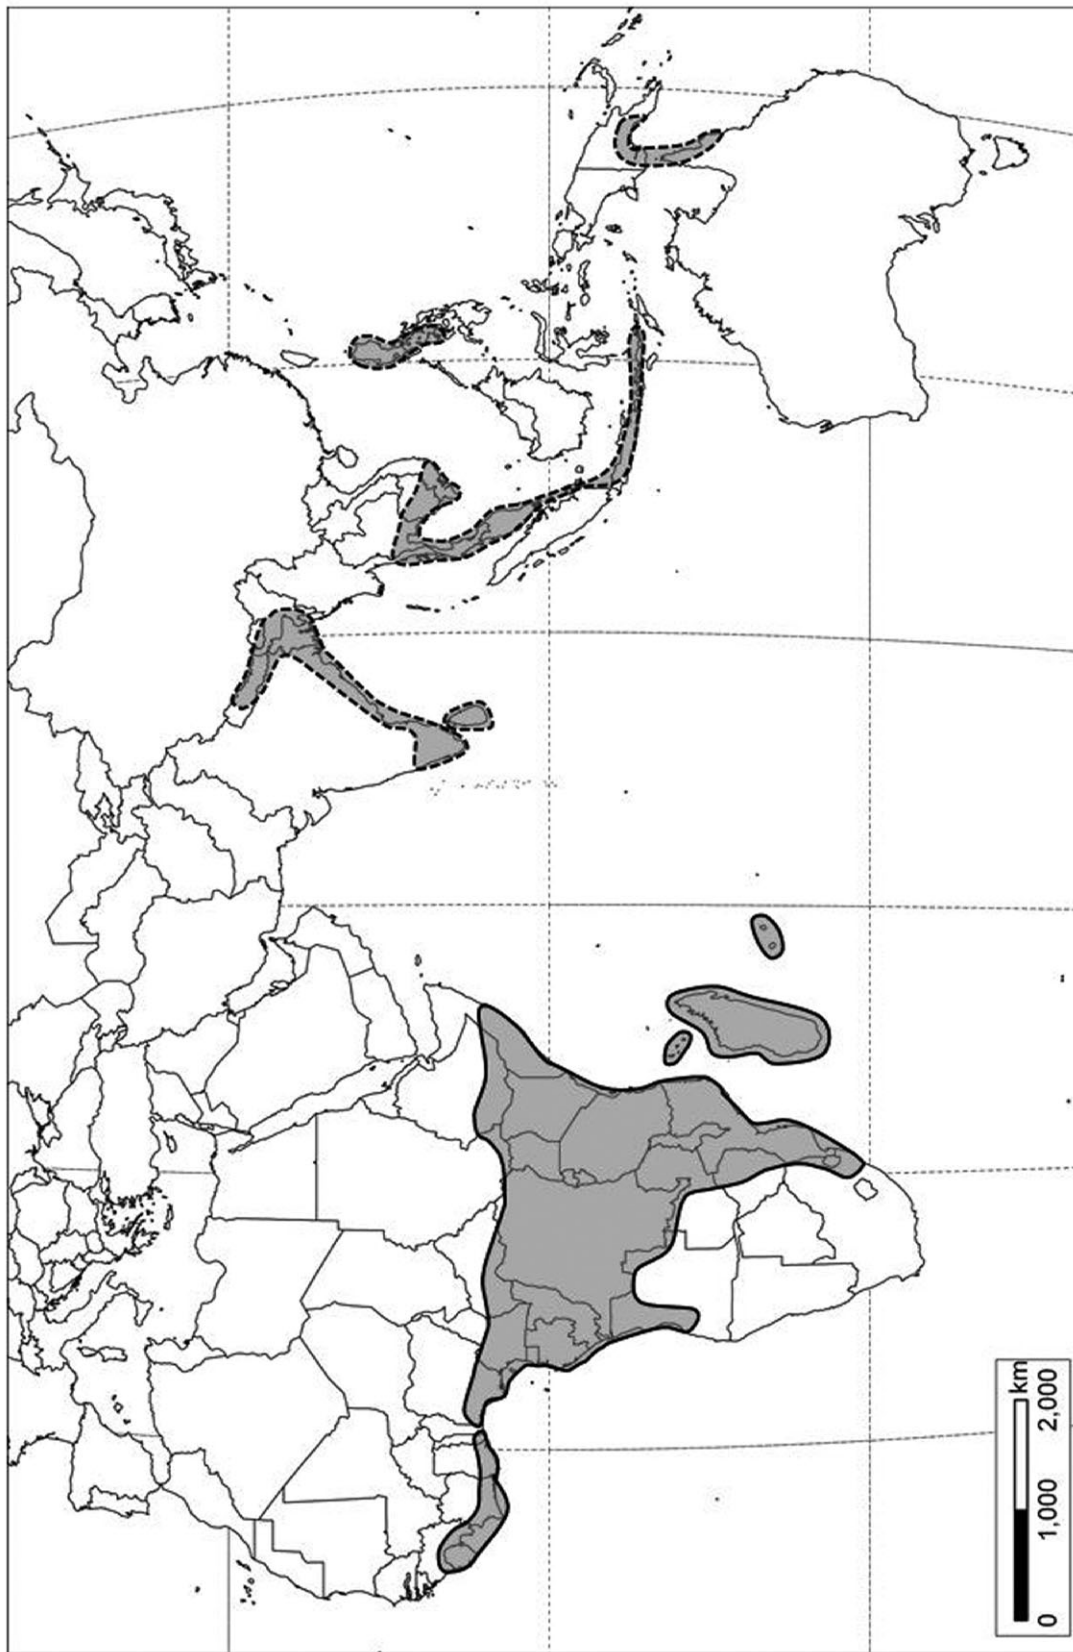

**Figure 4.** Generalized distribution map of *Coffea*. Dashed lines show new areas of distribution for *Coffea*, following the inclusion of Asian and Australasian *Psilanthus* spp.



dispersal from Africa to India is an equally plausible hypothesis with the present data at hand.

It is now clear that future phylogenetic study of *Coffea*, including investigation of early lineage origins and diversification, refugia theories and genus-wide phylogenetics, will have to sample species formerly included in *Psilanthus*. More inclusive studies are likely to alter pre-existing theories of relationships of *Coffea* spp. (e.g. Maurin *et al.*, 2007), especially for Africa species. The challenge will now be to gather these extra samples and locate molecular markers (plastid and nuclear) that will provide further informative characters.

#### ACKNOWLEDGEMENTS

We would like to thank the following organizations and individuals who provided plant material for this study, including: the National Centre for Applied Research on Rural Development (FOFIFA), IRD-Montpellier, P. De Block (BR), Q. Luke (EA), F. Mbago (DSM), F. Rakotonasolo (TAN), B. Sonké (Université de Yaoundé II) and P. Stoffelen (BR). Permission to sample and study herbarium and/or living collections from BR, BRI, DSM, K and NSW is gratefully acknowledged [herbarium abbreviations after Holmgren, Holmgren & Barnett, (1990)]. We thank the DNA bank managers of the Jodrell Laboratory, Royal Botanic Gardens, Kew (L. Csiba, and E. Kapinos) for DNA extractions. We also greatly appreciate the evaluation of an earlier version of this contribution by two anonymous reviewers, and especially P. Stoffelen (BR) for sharing his expertise of African *Coffea*.

#### REFERENCES

- Andreasen K, Bremer B. 1996.** Phylogeny of the subfamily Ixoroideae (Rubiaceae). *Opera Botanica Belgica* **7**: 119–138.
- Andreasen K, Bremer B. 2000.** Combined phylogenetic analysis in the Rubiaceae–Ixoroideae: morphology, nuclear and chloroplast DNA data. *American Journal of Botany* **87**: 1731–1748.
- Anthony F, Diniz LEC, Combes M-C, Lashermes P. 2010.** Adaptive radiation in *Coffea* subgenus *Coffea* L. (Rubiaceae) in Africa and Madagascar. *Plant Systematics and Evolution* **285**: 51–64.
- Bremer K. 1988.** The limits of amino-acid sequence data in angiosperm phylogenetic reconstruction. *Evolution* **42**: 795–803.
- Bremer K. 1994.** Branch support and tree stability. *Cladistics: The International Journal of the Willi Hennig Society* **10**: 295–304.
- Brenan JPM. 1953.** Tropical African plants: XXIII. *Kew Bulletin* **8**: 83–120.
- Bridson DM. 1982.** Studies in *Coffea* and *Psilanthus* for part 2 of 'Flora of Tropical East Africa': Rubiaceae. *Kew Bulletin* **36**: 817–860.
- Bridson DM. 1987.** Nomenclatural notes on *Psilanthus*, including *Coffea* sect. *Paracoffea* (Rubiaceae tribe Coffeae). *Kew Bulletin* **42**: 453–460.
- Bridson DM. 1988a.** *Coffea*. In: Polhill RM, ed. *Flora of tropical East Africa, Rubiaceae, part 2*. Rotterdam: Balkema, 415–474.
- Bridson DM. 1988b.** Classification. In: Wrigley G, ed. *Coffee – tropical agriculture series*. Harlow: Longman Scientific & Technical, 61–75.
- Bridson DM. 2003.** *Coffea*. In: Pope GV, ed. *Flora zambesiaca*, Vol. 3. Kew: Royal Botanic Gardens, 452–463.
- Burkill HM. 1997.** *The useful plants of West Tropical Africa*, 2nd Ed, Vol. 4. Kew: Royal Botanic Gardens.
- Cheney RH. 1925.** *Coffee. A monograph of the economic species of the genus Coffea L.* New York: New York University Press.
- Chevalier A. 1929.** Les caféiers du globe, fasc. 1: généralités sur les caféiers. *Encyclopédie Biologique* **5**: 1–196.
- Chevalier A. 1938.** Essai d'un groupement systématique des caféiers sauvages de Madagascar et des Iles Mascareignes. *Revue de Botanique Appliquée et d'Agriculture Tropicale* **18**: 825–843.
- Chevalier A. 1942.** Les caféiers du globe, fasc. 2: iconographie des caféiers sauvages et cultivés. *Encyclopédie Biologique* **12**: 1–36, pl. 1–158.
- Chevalier A. 1947.** Les caféiers du globe, fasc. 3: systématique des caféiers et faux-caféiers maladies et insectes nuisibles. *Encyclopédie Biologique* **28**: 1–352.
- Chinnappa CC, Warner BG. 1981.** Pollen morphology in the genus *Coffea* (Rubiaceae) and its taxonomic significance. *Botanical Journal of the Linnean Society* **83**: 221–236.
- Couturon E, Lashermes P, Charrier A. 1998.** First intergeneric hybrids (*Psilanthus ebracteolatus* Hiern × *Coffea arabica* L.) in coffee trees. *Canadian Journal of Botany* **76**: 542–546.
- Crisp MD, Isagi Y, Kato Y, Cook LG, Bowman DMJS. 2010.** *Livistona* palms in Australia: ancient relics or opportunistic immigrants? *Molecular Phylogenetics and Evolution* **54**: 512–523.
- Cros J, Combes MC, Trouslot P, Anthony F, Hamon S, Charrier A, Lashermes P. 1998.** Phylogenetic analysis of chloroplast DNA variation in *Coffea* L. *Molecular Phylogenetics and Evolution* **9**: 109–117.
- Davis AP. 2003.** A new combination in *Psilanthus* (Rubiaceae) for Australia, and nomenclatural notes on *Paracoffea*. *Novon* **13**: 182–184.
- Davis AP. 2010.** Six species of *Psilanthus* transferred to *Coffea* (Coffeae, Rubiaceae). *Phytotaxa* **10**: 41–45.
- Davis AP. 2011.** *Psilanthus mannii* Hook.f., the type species of *Psilanthus* Hook.f., transferred to *Coffea* L. *Nordic Journal of Botany* **29**: 471–472.
- Davis AP, Bridson DM, Rakotonasolo F. 2005.** A re-examination of *Coffea* subgenus *Baracoffea* and comments on the morphology and classification of *Coffea* and *Psilanthus* (Rubiaceae–Coffeae). In: Keating RC, Hollowell

- VC, Croat T, eds. *A festschrift for William G. D'Arcy: the legacy of a taxonomist. (Monographs in systematic botany 104)*. St Louis, MO: Missouri Botanical Garden Press, 399–420.
- Davis AP, Chester M, Maurin O, Fay M. 2007.** Searching for the relatives of *Coffea* (Rubiaceae, Ixoroideae): the circumscription and phylogeny of Coffeae based on plastid sequence data and morphology. *American Journal of Botany* **94**: 313–329.
- Davis AP, Govaerts R, Bridson DM, Stoffelen P. 2006.** An annotated taxonomic conspectus of the genus *Coffea* (Rubiaceae). *Botanical Journal of the Linnean Society* **152**: 465–512.
- Davis AP, Rakotonasolo F. 2008.** A taxonomic revision of the *baracoffea* alliance: nine remarkable *Coffea* species from western Madagascar. *Botanical Journal of the Linnean Society* **158**: 355–390.
- Davis AP, Rakotonasolo F, De Block P. 2010.** *Coffea toshii* sp. nov. (Rubiaceae) from Madagascar. *Nordic Journal of Botany* **28**: 1341–1336.
- Davis AP, Sonké B. 2008.** A new *Argocoffeopsis* (Coffeae, Rubiaceae) from Southern Cameroon: *Argocoffeopsis spathulata*. *Blumea* **53**: 527–532.
- De Wildeman EAJ. 1910.** *Compagnie du Kasai. Mission permanente d'études scientifiques. Résultats de ses recherches botaniques et agronomiques*. Brussels: A. Lesigne.
- Deb DB. 2002.** The genus *Psilanthus* Hook.f. tribe Coffeae (Rubiaceae) in India – a review. *Journal of Economic and Taxonomic Botany* **26**: 239–242.
- Edgar RC. 2004.** MUSCLE: multiple sequence alignment with high accuracy and high throughput. *Nucleic Acids Research* **32**: 1792–1797.
- Felsenstein J. 1985.** Confidence limits on phylogenies: an approach using the bootstrap. *Evolution* **39**: 783–791.
- Fitch WM. 1971.** Toward defining the course of evolution: minimum change for a specific tree topology. *Systematic Zoology* **20**: 406–416.
- Forster PI. 2004.** The tribe Coffeae DC. (Rubiaceae: Ixoroideae) in Australia. *Austrobaileya* **6**: 903–909.
- Govaerts R, Ruhsam M, Andersson L, Robbrecht E, Bridson D, Davis AP, Schanzer I, Sonké B. 2011.** *World checklist of Rubiaceae*. Kew: Board of Trustees of the Royal Botanic Gardens. Available at: <http://www.kew.org/wcps/rubiaceae> [accessed 1 June 2011].
- Hiern WP. 1877.** *Psilanthus*. In: Oliver D, ed. *Flora of tropical Africa*, Vol. 3. Ashford: L. Reeve & Co., 185–187.
- Holmgren PK, Holmgren NH, Barnett LC. 1990.** Index herbariorum. Part 1: the herbaria of the world, 8th edn. *Regnum Vegetabile*. New York, NY: New York Botanical Garden, 1–693.
- Hooker JD. 1873a.** *Psilanthus mannii*, Hook.f. *Hooker's Icones Plantarum*, Vol. 2, 3rd series. London: Williams & Norgate, t. 1129.
- Hooker JD. 1873b.** 239. *Psilanthus*. *Genera plantarum*, Vol. 2, Part 1. London: Lovell Reeve & Co., 115.
- Huelsenbeck JP, Ronquist F. 2001.** MRBAYES. Bayesian inference of phylogeny. *Bioinformatics (Oxford, England)* **17**: 754–755.
- Källersjö M, Farris JS, Kluge AG, Bult C. 1992.** Skewness and permutation. *Cladistics: The International Journal of the Willi Hennig Society* **8**: 275–287.
- Kumar SA, Sudisha J, Sreenath HL. 2008.** Genetic relation of *Coffea* and Indian *Psilanthus* species as revealed through RAPD and ISSR markers. *International Journal of Integrative Biology* **3**: 150–158.
- Lashermes P, Combes M-C, Robert J, Trouslot P, D'hont A, Anthony F, Charrier A. 1999.** Molecular characterisation and origin of the *Coffea arabica* L. genome. *Molecular and General Genetics* **261**: 259–266.
- Lashermes P, Combes M-C, Trouslot P, Charrier A. 1997.** Phylogenetic relationships of coffee-tree species (*Coffea* L.) as inferred from ITS sequences of nuclear ribosomal DNA. *Theoretical and Applied Genetics* **94**: 947–955.
- Lebrun J. 1941.** Recherches morphologiques et systématiques sur les caféiers du Congo. *Publications de L'institut National pour L'étude Agronomique du Congo Belge* **11**: 1–183.
- Leroy J-F. 1961.** Notes sur quelques caféiers. *Journal d'Agriculture Tropicale et de Botanique Appliquée* **8**: 537–541.
- Leroy J-F. 1962a.** Sur l'existence d'un caféier sauvage aux Iles Philippines: *Coffea mabesae* (Elmer) J.F.Ler. (subg. *Paracoffea*). *Journal d'Agriculture Tropicale et de Botanique Appliquée* **9**: 417–419.
- Leroy J-F. 1962b.** A propos du *Coffea lebruniana*; sa presence au Gabon. Note sur l'*Argocoffea rupestris* (Hiern) Lebrun. *Journal d'Agriculture Tropicale et de Botanique Appliquée* **9**: 420–422.
- Leroy J-F. 1967a.** Diagnose différentielle du genre *Paracoffea* Leroy. *Journal d'Agriculture Tropicale et de Botanique Appliquée* **14**: 276.
- Leroy J-F. 1967b.** Recherches sur les caféiers. Sur la classification biologique des caféiers et sur l'origine et l'aire du genre *Coffea*. *Compte Rendu Hebdomadaire des Séances de l'Académie des Sciences Série D, Sciences Naturelles* **265**: 1043–1045.
- Leroy J-F. 1967c.** Recherches sur les caféiers. Esquisse d'une théorie sur l'évolution des espèces. *Compte Rendu Hebdomadaire des Séances de l'Académie des Sciences Série D, Sciences Naturelles* **265**: 1373–1376.
- Leroy J-F. 1968a. [dated 1967].** Un caféier du genre *Paracoffea* en Nouvelle-Guinée. *Journal d'Agriculture Tropicale et de Botanique Appliquée* **14**: 598–600.
- Leroy J-F. 1968b. [dated 1967].** La loi de corrélation de croissance chez les caféiers: cas d'une espèce d'Indonésie (*Paracoffea floresiana*). *Journal d'Agriculture Tropicale et de Botanique Appliquée* **14**: 601–608.
- Leroy J-F. 1972a. [dated 1971].** Note sur un caféier du sud-est Asiatique: *Paracoffea merguensis* (Ridl.) J.-F. Leroy. *Adansonia ser. 2* **11**: 604–614.
- Leroy J-F. 1972b.** Le concept d'une unité de développement et la taxonomie du genre *Paracoffea* J.-F. Leroy. *Compte Rendu Hebdomadaire des Séances de l'Académie des Sciences Série D, Sciences Naturelles* **274**: 2763–2766.
- Leroy J-F. 1980a.** Les grandes lignées de caféiers. *Association Scientifique Internationale du Café (ASIC) 9th Colloque*, 473–477.

- Leroy J-F. 1980b.** Evolution et taxogenèse chez les caféiers (*Coffea* L., *Psilanthus* Hook.f. et *Nostolachma* Durand). Hypothèse sur leur origine. *Compte Rendu Hebdomadaire des Séances de l'Académie des Sciences Série D, Sciences Naturelles* **291**: 593–596.
- Leroy J-F. 1981.** Les caféiers du genre *Psilanthus* (Rubiaceae) en Afrique orientale et en Asie et îles du Pacifique. *Bulletin du Museum National d'Histoire Naturelle. 4e Serie Section B, Adansonia Botanique Phytochimie* **3**: 251–258.
- Leroy J-F. 1982.** L'origine kenyane du genre *Coffea* L. et la radiation des espèces à Madagascar. *Association Scientifique Internationale du Café (ASIC) 10th Colloque*, 413–420.
- Linnaeus C. 1753.** *Species plantarum*, Vol. 1. Stockholm: Laurentius Salvius.
- Lobreau-Callen D, Leroy J-F. 1980.** Quelques données palynologiques sur le genre *Coffea* et autres genres du cercle des caféiers. *Association Scientifique Internationale du Café (ASIC) 9th Colloque*, 479–506.
- Lombello RA, Pinto-Maglio CAF. 2003.** Cytogenetic studies in *Psilanthus ebracteolatus* Hiern., a wild diploid coffee species. *Cytologia* **68**: 425–429.
- Lombello RA, Pinto-Maglio CAF. 2004.** Cytogenetic studies in *Coffea* L. and *Psilanthus* Hook.f. using CMA/DAPI and FISH. *Cytologia* **69**: 85–91.
- Maddison DR, Maddison WP. 2002.** *Macclade 4: analysis of phylogeny and character evolution version 4.01*. Sunderland: Sinauer Associates.
- Maurin O, Davis AP, Chester M, Mvungi EF, Jaufferally-Fakim Y, Fay MF. 2007.** Towards a phylogeny for *Coffea* (Rubiaceae): identifying well-supported lineages based on nuclear and plastid DNA sequences. *Annals of Botany* **100**: 1565–1583.
- McNeill J, Barrie FR, Burdet HM, Demoulin V, Hawksworth DL, Marhold K, Nicolson DH, Prado J, Silva PC, Skog JE, Wiersema JH, Turland NJ. 2006.** International code of botanical nomenclature (Vienna code). *Regnum Vegetabile* **146**: 1–568.
- Moens P. 1962.** La place systématique du *Coffea lebruniana* Germain et Kesler. *Bulletin du Jardin botanique de l'État a Bruxelles* **32**: 129–131.
- Posada D, Crandall KA. 1998.** Modeltest: testing the model of DNA substitution. *Bioinformatics (Oxford, England)* **14**: 817–818.
- Rambaut A, Drummond AJ. 2007.** *Tracer ver. 1.4*. Available at: <http://beast.bio.ed.ac.uk/Tracer>
- Robbrecht E. 1986.** Studies in tropical African Rubiaceae (7–12). *Bulletin du Jardin Botanique National de Belgique* **56**: 145–162.
- Robbrecht E, Puff C. 1986.** A survey of the Gardenieae and related tribes (Rubiaceae). *Botanische Jahrbücher für Systematik* **108**: 63–137.
- Schrire BD, Lavin M, Barker NP, Forest F. 2009.** Phylogeny of the tribe Indigofereae (Leguminosae–Papilionoideae): geographically structured more in succulent-rich and temperate settings than in grass-rich environments. *American Journal of Botany* **96**: 816–852.
- Sivarajan VV, Biju SD, Mathew P. 1992.** Revision of the genus *Psilanthus* Hook.f. (Rubiaceae, tribe Coffeae) in India. *Botanical Bulletin of Academia Sinica* **33**: 209–224.
- Stoffelen P. 1998.** *Coffea* and *Psilanthus* in Tropical Africa: a systematic and palynological study, including a revision of the West and Central African Species. PhD Thesis. Katholieke Universiteit Leuven.
- Stoffelen P, Noiro M, Couturon E, Anthony F. 2008.** A new caffeine-free coffee from Cameroon. *Botanical Journal of the Linnean Society* **158**: 67–72.
- Stoffelen P, Robbrecht E, Smets E. 1997.** Pollen morphology of *Coffea* and *Psilanthus* (Rubiaceae), mainly from Africa. *Grana* **36**: 313–327.
- Tosh J, Davis AP, Dessein S, De Block P, Huysmans S, Fay MF, Smets E, Robbrecht E. 2009.** Phylogeny of *Tricalysia* (Rubiaceae) and its relationships with allied genera based on plastid DNA data: resurrection of the genus *Empogona*. *Annals of the Missouri Botanical Garden* **96**: 194–213.
- Wellman FL. 1961.** *Coffee, botany, cultivation and utilization*. London: Leonard Hill Books.
- White F. 1979.** The Guineo-Congolian Region and its relationships to other phytochoria. *Bulletin du Jardin Botanique National de Belgique* **49**: 11–55.
- White F. 1983.** *The vegetation of Africa. A descriptive memoir to accompany the Unesco/AETFAT/UNSO vegetation map of Africa*. Paris: Unesco.
- White F, Léonard J. 1991.** Phytogeographical links between Africa and southwest Asia. *Flora Vegetatio Mundi* **9**: 229–246.

## APPENDIX 1

**Generic synonymy for *Coffea***

*COFFEA* L., SP. PL. 172 (1753). TYPE: *COFFEA ARABICA* L.

*Cafe* Adans., *Fam. Pl.* **2**: 500 (1763).

*Cafea* Adans., *Fam. Pl.* **2**: 145 (1763).

*Hexepta* Raf., *Sylva Tellur.* 164 (1838).

*Leiochilus* Hook.f. in G.Bentham & J.D.Hooker, *Gen. Pl.* **2**: 116 (1873).

*Psilanthus* Hook.f., *Hooker's Icon. Pl.* **12**: t. 1129 (1873), **syn. nov.**

*Pleurocoffea* Baill., *Bull. Mens. Soc. Linn. Paris* **1**: 270 (1880).

*Solenixora* Baill., *Bull. Mens. Soc. Linn. Paris* **1**: 242 (1880).

*Buseria* T.Durand, *Index Gen. Phan.* 501 (1888).

*Paolia* Chiov., *Result. Sci. Miss Stefan.-Paoli Somal. Ital.* **1**: 93 (1916).

*Psilanthopsis* A.Chev., *Rev. Bot. Appl. Agric. Trop.* **19**: 403 (1939).

*Nescidia* A.Rich. ex DC., *Prodr.* **4**: 477 (Sept. 1830).

*Cofeanthus* A.Chev., *Cafeiers du Globe* **3**: 226 (1947).\*

*Paracoffea* J.-F.Leroy, *J. Agric. Trop. Bot. Appl.* **14**: 276 (1967 publ. 1968).\*

\*Formerly synonyms of *Psilanthus*.

Number of species: 124.

Distribution: Tropical Old World: Africa, West Indian Ocean Islands (Madagascar, Comoros, Mascarenes), South Asia, south-east Asia, Papua New Guinea and Australia. TDWG: 22; 23; 24; 25; 26; 27; 29; 40; 41; 42; 43; 50. Figure 4.

**Species of *Coffea* formerly included in *Psilanthus***  
The accepted name of each species is given in bold, with the basionym or most recently replaced name in italics.

**1. *Coffea benghalensis*** B.Heyne ex Schult. in J.J.Roemer & J.A.Schultes, *Syst. Veg.* **5**: 200 (1819).

**1a. var. *benghalensis***

*Psilanthus benghalensis* (B.Heyne ex Schult.) J.-F.Leroy, *Bull. Mus. Natl. Hist. Nat., B, Adansonia* **3**: 252 (1981).

**Distribution:** – India, Nepal and Bhutan.

**1b. var. *bababudanii*** (Sivar., Biju & P.Mathew) A.P.Davis, *Phytotaxa* **10**: 42 (2010).

*Psilanthus bababudanii* Sivar., Biju & P.Mathew, *Bot. Bull. Acad. Sin., n.s.*, **33**: 212 (1992).

**Distribution:** – Western India.

**2. *Coffea brassii*** (J.-F.Leroy) A.P.Davis, *Phytotaxa* **10**: 42 (2010).

*Psilanthus brassii* (J.-F.Leroy) A.P.Davis, *Novon* **13**: 183 (2003).

**Distribution:** – Southern Papua New Guinea and north-eastern Australia (including Torres Strait Islands).

**3. *Coffea cochinchinensis*** Pierre ex Pit. in H.Lecomte, *Fl. Indo-Chine* **3**: 337 (1924).

*Psilanthus cochinchinensis* (Pierre ex Pit.) J.-F.Leroy, *Bull. Mus. Natl. Hist. Nat., B, Adansonia* **3**: 256 (1981 publ. 1982).

**Distribution:** – Cambodia and Vietnam.

**4. *Coffea ebracteolata*** (Hiern) Brenan, *Kew Bull.* **8**: 115 (1953).

*Psilanthus ebracteolatus* Hiern in D.Oliver & auct. suc. (eds.), *Fl. Trop. Afr.* **3**: 186 (1877).

**Distribution:** – West Tropical Africa.

**5. *Coffea floresiana*** Boerl., *Handl. Fl. Ned. Ind.* **11**: 136 (1891).

*Psilanthus floresianus* (Boerl.) J.-F.Leroy, *Bull. Mus. Natl. Hist. Nat., B, Adansonia* **3**: 256 (1981 publ. 1982).

**Distribution:** – Lesser Sunda Islands.

**6. *Coffea fragrans*** Wall. ex Hook.f., *Fl. Brit. India* **3**: 154 (1880).

*Psilanthus fragrans* (Wall. ex Hook.f.) J.-F.Leroy, *Bull. Mus. Natl. Hist. Nat., B, Adansonia* **3**: 256 (1981 publ. 1982).

**Distribution:** – Bangladesh; reported to be in cultivation in India (Sivarajan *et al.*, 1992).

**7. *Coffea horsfieldiana*** Miq., *Fl. Ned. Ind.* **2**: 308 (1857).

*Psilanthus horsfieldianus* (Miq.) J.-F.Leroy, *Ass. Sci. Internat. Café Colloque* **9**: 482 (1980).

**Distribution:** – Java.

**8. *Coffea malabarica*** (Sivar., Biju & P.Mathew) A.P.Davis, *Phytotaxa* **10**: 42 (2010).

*Psilanthus malabaricus* Sivar., Biju & P.Mathew *Bot. Bull. Acad. Sin., n.s.*, **33**: 219 (1992).

**Distribution:** – Western India.

**9. *Coffea lebruniana*** Germ. & Kesler, *Bull. Jard. Bot. État* **25**: 405 (1955).

*Psilanthus lebrunianus* (Germ. & Kesler) J.-F.Leroy ex Bridson, *Kew Bull.* **42**: 456 (1987).

**Distribution:** – West and Central Tropical Africa.

**10. *Coffea madurensis*** Teijsm. & Binn. ex Koord., *Teysmannia* **11**: 30 (1900).

*Psilanthus madurensis* (Teijsm. & Binn. ex Koord.) J.-F.Leroy, *Bull. Mus. Natl. Hist. Nat., B, Adansonia* **3**: 256 (1981 publ. 1982).

**Distribution:** – Java (Madura Islands).

**11. *Coffea mabesae*** (Elmer) J.-F.Leroy, *J. Agric. Trop. Bot. Appl.* **9**: 419 (1962).

*Psilanthus mabesae* (Elmer) J.-F.Leroy, *Bull. Mus. Natl. Hist. Nat., B, Adansonia* **3**: 256 (1981 publ. 1982).

**Distribution:** – Philippines.

**12. *Coffea mannii*** (Hook.f.) A.P.Davis, *Nord. J. Bot.* **29**: 471 (2011).

*Psilanthus mannii* Hook.f., *Hooker's Icon. Pl.* **12**: t. 1129 (1873).

**Distribution:** – West and Central Tropical Africa.

**13. *Coffea melanocarpa*** Welw. ex Hiern, *Trans. Linn. Soc. London, Bot.* **1**: 173 (1876).

*Psilanthus melanocarpus* (Welw. ex Hiern) J.-F.Leroy, *Ass. Sci. Internat. Café Colloque* **9**: 482 (1980).

**Distribution:** – Cabinda and Angola.

**14. *Coffea merguensis*** Ridl., *J. Fed. Malay States Mus.* **10**: 96 (1920).

*Psilanthus merguensis* (Ridl.) J.-F.Leroy, *Ass. Sci. Internat. Café Colloque* **9**: 482 (1980).

**Distribution:** – Myanmar (Burma), Thailand and Vietnam.

**15. *Coffea neobridsoniae*** A.P.Davis, *Phytotaxa* **10**: 43 (2010).

*Psilanthus bridsoniae* Sivar., Biju & P.Mathew, *Bot. Bull. Acad. Sin., n.s.*, **33**: 216 (1992).

**Distribution:** – India.

**16. *Coffea neoleroyi*** A.P.Davis, *Phytotaxa* **10**: 43 (2010).

*Psilanthus leroyi* Bridson, *Kew Bull.* **36**: 857 (1982).

**Distribution:** – Ethiopia and Uganda.

**17. *Coffea sapinii*** (De Wild) A.P.Davis, *Phytotaxa* **10**: 43 (2010).

*Psilanthus sapinii* De Wild., *Compagnie du Kasai*: 425 (1910).

**Distribution:** – Democratic Republic of Congo.

**18. *Coffea semsei*** (Bridson) A.P.Davis, *Phytotaxa* **10**: 43 (2010).

*Psilanthus semsei* Bridson, *Kew Bull.* **36**: 854 (1982).

**Distribution:** – Tanzania.

**19. *Coffea travancorensis*** Wight & Arn., *Prodr. Fl. Ind. Orient.* 435 (1834).

*Psilanthus travancorensis* (Wight & Arn.) J.-F.Leroy, *Ass. Sci. Internat. Café Colloque* **9**: 482 (1980).

**Distribution:** – Southern India and Sri Lanka.

**20. *Coffea wightiana*** Wall. ex Wight & Arn., *Prodr. Fl. Ind. Orient.* 436 (1834).

*Psilanthus wightianus* (Wall. ex Wight & Arn.) J.-F.Leroy, *Bull. Mus. Natl. Hist. Nat., B, Adansonia* **3**: 252 (1981 publ. 1982).

**Distribution:** – Southern India and Sri Lanka.
